# Supplementary material for: Single-Cell RNA Sequencing of the Nucleus Pulposus Reveals Chondrocyte Differentiation and Regulation in Intervertebral Disc Degeneration
Source: Front Cell Dev Biol. 2022 Feb 21;10:824771. doi: 10.3389/fcell.2022.824771 (PMC8899542; doi:10.3389/fcell.2022.824771)
Supplement: Supplementary file 1 [file DataSheet4.XLSX]

## Sheet: Sheet1
Supplementary Table 3. DEGs among the 7 chondrocyte subpopulations defined in NP
gene	p_val	avg_logFC	pct.1	pct.2	p_val_adj	cluster
MMP3	1.21905e-118	0.875946	0.516	0.429	2.69532e-114	C1
PDE4B	1.08954e-294	0.84575	0.536	0.383	2.40898e-290	C1
CXCL8	1.07319e-22	0.698336	0.216	0.179	2.37283e-18	C1
TNFRSF11B	4.1096e-181	0.61467	0.65	0.55	9.08634e-177	C1
MGP	0	0.565627	0.993	0.968	0	C1
ADPRHL1	1.40289e-168	0.520295	0.502	0.369	3.10179e-164	C1
FGF2	0	0.519853	0.627	0.436	0	C1
BMP2	1.05133e-112	0.515432	0.424	0.336	2.32449e-108	C1
C11orf96	7.61057e-113	0.493009	0.483	0.391	1.6827e-108	C1
SOD2	7.36594e-144	0.48961	0.817	0.761	1.62861e-139	C1
CD55	0	0.488214	0.895	0.791	0	C1
PLA2G2A	4.23773e-53	0.461524	0.3	0.231	9.36963e-49	C1
GPX3	0	0.447439	0.984	0.938	0	C1
INHBA	6.78912e-154	0.437408	0.717	0.64	1.50107e-149	C1
GPRC5A	0	0.432488	0.887	0.741	0	C1
CLU	0	0.407178	1	0.992	0	C1
SLC7A2	1.25079e-96	0.404783	0.442	0.353	2.76549e-92	C1
SLPI	1.66788e-172	0.403558	0.584	0.45	3.68768e-168	C1
AKR1C2	6.49335e-12	0.39815	0.293	0.281	1.43568e-07	C1
CHI3L1	3.51409e-69	0.397129	0.457	0.376	7.76966e-65	C1
APOD	2.5632e-50	0.383662	0.425	0.351	5.66724e-46	C1
IER3	0.00132473	0.378088	0.518	0.539	1	C1
PMP22	0	0.370625	0.921	0.843	0	C1
CP	9.18781e-225	0.366175	0.656	0.496	2.03142e-220	C1
KCNMA1	4.46615e-117	0.362441	0.693	0.621	9.87465e-113	C1
ERRFI1	2.75995e-61	0.362096	0.769	0.751	6.10224e-57	C1
CXCL2	1.04782e-10	0.348974	0.181	0.157	2.31672e-06	C1
SERPINA1	1.09664e-258	0.343651	0.934	0.828	2.42467e-254	C1
ARID5B	5.13764e-136	0.318116	0.71	0.626	1.13593e-131	C1
DDX21	1.12105e-129	0.31731	0.709	0.637	2.47865e-125	C1
DSP	9.80687e-96	0.307825	0.39	0.293	2.1683e-91	C1
MT1G	7.81589e-105	0.304543	0.546	0.435	1.72809e-100	C1
TXNRD1	1.13204e-75	0.304278	0.455	0.385	2.50293e-71	C1
TGIF1	1.65573e-113	0.302922	0.516	0.425	3.66082e-109	C1
MT1H	4.52135e-62	0.302519	0.219	0.148	9.99671e-58	C1
SLC25A37	1.00479e-155	0.300982	0.63	0.542	2.2216e-151	C1
CHD2	3.10302e-111	0.30036	0.539	0.453	6.86077e-107	C1
RUNX1	5.41006e-131	0.299626	0.519	0.424	1.19617e-126	C1
SOX9	9.59853e-190	0.296028	0.796	0.708	2.12224e-185	C1
RCAN1	2.85307e-23	0.292384	0.435	0.411	6.30814e-19	C1
C2orf40	2.43131e-146	0.291047	0.956	0.882	5.37563e-142	C1
SLC38A1	1.49295e-145	0.290852	0.502	0.378	3.3009e-141	C1
BTG1	8.02246e-251	0.290419	0.968	0.94	1.77377e-246	C1
MTHFD2	3.99506e-115	0.290175	0.631	0.549	8.83308e-111	C1
CDO1	3.19646e-126	0.279658	0.626	0.529	7.06737e-122	C1
KLF3	7.97341e-41	0.277844	0.389	0.343	1.76292e-36	C1
RSL24D1	3.71344e-169	0.266229	0.761	0.683	8.21042e-165	C1
TRIB1	9.99236e-49	0.263172	0.338	0.279	2.20931e-44	C1
F13A1	2.09562e-225	0.25794	0.743	0.566	4.63341e-221	C1
HMOX1	2.16385e-77	0.256137	0.698	0.632	4.78428e-73	C1
EIF1B	2.64868e-139	0.252957	0.74	0.675	5.85623e-135	C1
PRG4	8.59753e-150	0.779828	0.714	0.585	1.90091e-145	C2
SPARC	1.05294e-265	0.706891	0.974	0.877	2.32804e-261	C2
MSMO1	3.2505e-260	0.624071	0.536	0.299	7.18686e-256	C2
CYTL1	9.07181e-43	0.617117	0.403	0.305	2.00578e-38	C2
COL2A1	3.45496e-166	0.600514	0.814	0.633	7.63892e-162	C2
ABI3BP	7.54518e-215	0.57507	0.973	0.927	1.66824e-210	C2
S100A2	1.82063e-63	0.541509	0.211	0.119	4.02541e-59	C2
VCAN	1.07278e-233	0.51822	0.816	0.61	2.37191e-229	C2
TIMP1	8.31782e-97	0.509385	0.978	0.934	1.83907e-92	C2
HAPLN1	8.85223e-272	0.476587	0.951	0.8	1.95723e-267	C2
TIMP3	2.99733e-167	0.471991	0.764	0.576	6.62709e-163	C2
FGFBP2	2.78368e-200	0.458178	0.923	0.769	6.15472e-196	C2
S100A4	3.76195e-254	0.456396	0.866	0.665	8.31768e-250	C2
INHBA	1.04762e-126	0.438095	0.815	0.652	2.31629e-122	C2
PCOLCE2	0	0.435173	0.961	0.847	0	C2
COL11A1	1.66847e-129	0.424	0.912	0.79	3.68899e-125	C2
COL5A1	9.17542e-161	0.418504	0.502	0.296	2.02869e-156	C2
SERPINA5	2.75636e-224	0.415903	0.723	0.473	6.09431e-220	C2
NFATC2	3.4688e-213	0.409364	0.563	0.325	7.66953e-209	C2
SCRG1	1.29843e-218	0.40911	0.98	0.881	2.87084e-214	C2
IL11	9.60969e-108	0.394302	0.164	0.068	2.1247e-103	C2
SQLE	3.15657e-158	0.389999	0.504	0.311	6.97918e-154	C2
SRPX2	2.46918e-215	0.385734	0.504	0.28	5.45936e-211	C2
FGF1	6.21425e-121	0.382441	0.29	0.149	1.37397e-116	C2
HMGCR	1.41471e-160	0.381515	0.52	0.324	3.12792e-156	C2
COL1A2	7.21242e-104	0.381447	0.572	0.4	1.59467e-99	C2
MIA	6.12971e-218	0.376574	0.773	0.518	1.35528e-213	C2
HMGCS1	1.55303e-76	0.37543	0.596	0.468	3.43376e-72	C2
A2M	5.23444e-05	0.369232	0.399	0.375	1	C2
TSPAN2	2.15502e-142	0.357648	0.479	0.288	4.76474e-138	C2
IDI1	1.8219e-114	0.348829	0.769	0.628	4.02821e-110	C2
IGFBP7	5.19508e-174	0.346715	0.688	0.474	1.14863e-169	C2
FMOD	4.71672e-190	0.344279	0.98	0.89	1.04287e-185	C2
CILP	8.63554e-40	0.33365	0.589	0.496	1.90932e-35	C2
SNORC	3.35621e-99	0.331426	0.626	0.456	7.42058e-95	C2
IGFBP5	1.62756e-59	0.325522	0.157	0.081	3.59854e-55	C2
CRLF1	9.29404e-219	0.321422	0.282	0.11	2.05491e-214	C2
PRELP	4.7869e-116	0.321275	0.989	0.934	1.05838e-111	C2
OGN	5.00303e-113	0.31488	0.951	0.869	1.10617e-108	C2
CDH19	1.35061e-154	0.31434	0.586	0.369	2.9862e-150	C2
DPT	2.46582e-132	0.313595	0.453	0.268	5.45193e-128	C2
WISP3	3.2149e-173	0.312944	0.59	0.37	7.10814e-169	C2
ATP1B1	5.41262e-171	0.312901	0.582	0.359	1.19673e-166	C2
PLAC9	3.72901e-111	0.311942	0.839	0.728	8.24483e-107	C2
COMP	8.02404e-153	0.31178	0.969	0.903	1.77411e-148	C2
VKORC1	1.36094e-154	0.307868	0.741	0.539	3.00905e-150	C2
SEMA3A	3.97678e-178	0.306394	0.327	0.152	8.79266e-174	C2
INSIG1	1.18625e-99	0.305782	0.65	0.486	2.6228e-95	C2
STK38L	4.88204e-117	0.303185	0.778	0.619	1.07942e-112	C2
KRT16	1.9802e-101	0.302819	0.145	0.057	4.37821e-97	C2
DSP	1.87596e-121	0.298946	0.493	0.311	4.14775e-117	C2
UGP2	3.12593e-128	0.296567	0.832	0.671	6.91144e-124	C2
CCND1	1.42551e-116	0.291167	0.456	0.286	3.1518e-112	C2
OSTC	1.63739e-149	0.289793	0.761	0.568	3.62028e-145	C2
PRDX4	1.44537e-135	0.285889	0.832	0.678	3.19571e-131	C2
COL8A1	2.65493e-62	0.28347	0.256	0.153	5.87005e-58	C2
SSR4	1.40383e-162	0.282703	0.916	0.8	3.10387e-158	C2
KRT17	1.23563e-72	0.27725	0.104	0.041	2.73199e-68	C2
LRRFIP1	7.86659e-89	0.273645	0.733	0.576	1.7393e-84	C2
TIAM2	2.12065e-131	0.268533	0.574	0.371	4.68877e-127	C2
COL3A1	1.94257e-101	0.268037	0.662	0.495	4.29503e-97	C2
CLEC3A	1.81841e-47	0.266087	0.556	0.441	4.02051e-43	C2
CILP2	5.35459e-111	0.265461	0.386	0.224	1.1839e-106	C2
COL5A2	1.95848e-120	0.264992	0.584	0.386	4.33019e-116	C2
KCNMA1	5.05021e-101	0.262371	0.798	0.63	1.1166e-96	C2
S100A1	5.29128e-111	0.261579	0.568	0.378	1.1699e-106	C2
CD55	3.05568e-102	0.259396	0.934	0.824	6.7561e-98	C2
AOC2	1.7601e-93	0.2563	0.327	0.194	3.89157e-89	C2
C2orf40	1.19342e-85	0.252395	0.969	0.908	2.63866e-81	C2
FXYD5	3.569e-100	0.252246	0.818	0.68	7.89105e-96	C2
CHAD	1.30767e-63	0.251295	0.637	0.507	2.89125e-59	C2
COL12A1	4.22983e-105	1.3691	0.664	0.189	9.35215e-101	C3
SAA1	1.78502e-29	1.28976	0.353	0.135	3.94668e-25	C3
MMP13	6.88712e-28	1.10927	0.152	0.034	1.52274e-23	C3
TNC	1.16206e-48	1.07947	0.526	0.203	2.56931e-44	C3
CXCL1	4.24127e-22	1.0145	0.176	0.051	9.37744e-18	C3
CHI3L2	9.23575e-44	0.985548	0.785	0.444	2.04202e-39	C3
MMP2	1.64825e-50	0.861081	0.294	0.07	3.64429e-46	C3
AEBP1	5.89415e-60	0.857619	0.941	0.745	1.3032e-55	C3
GREM1	2.4515e-28	0.839584	0.336	0.125	5.42026e-24	C3
IFITM1	2.07849e-21	0.837632	0.322	0.144	4.59555e-17	C3
GLUL	3.90379e-38	0.837165	0.706	0.422	8.63129e-34	C3
IL1R1	1.49153e-42	0.831762	0.675	0.358	3.29777e-38	C3
CHI3L1	5.68441e-25	0.824378	0.664	0.412	1.25682e-20	C3
KIAA1217	7.71704e-43	0.785752	0.343	0.104	1.70624e-38	C3
HMOX1	3.51302e-27	0.766703	0.792	0.662	7.76729e-23	C3
SOD2	3.63182e-46	0.752174	0.952	0.786	8.02996e-42	C3
CYTOR	1.02289e-21	0.730084	0.54	0.306	2.2616e-17	C3
CD44	1.00262e-48	0.715742	0.9	0.602	2.21679e-44	C3
CFH	2.90946e-36	0.708554	0.616	0.303	6.43282e-32	C3
FTH1	1.0302e-35	0.686093	0.862	0.703	2.27777e-31	C3
GJA1	1.47369e-41	0.674956	0.647	0.324	3.25834e-37	C3
LHFPL2	2.84672e-43	0.673214	0.509	0.205	6.2941e-39	C3
ABL2	3.92632e-38	0.662615	0.609	0.294	8.68109e-34	C3
SERTAD2	9.96829e-27	0.657151	0.678	0.425	2.20399e-22	C3
CYP1B1	1.14772e-29	0.652423	0.308	0.106	2.53761e-25	C3
THBS2	7.32912e-33	0.647283	0.73	0.422	1.62047e-28	C3
STEAP4	2.2362e-44	0.6394	0.225	0.048	4.94424e-40	C3
DDX21	9.44219e-27	0.635578	0.865	0.669	2.08767e-22	C3
IL32	3.56918e-22	0.615943	0.228	0.078	7.89146e-18	C3
TNFAIP6	5.20371e-20	0.611391	0.671	0.426	1.15054e-15	C3
AKR1C1	2.40957e-15	0.606213	0.336	0.173	5.32755e-11	C3
WTAP	6.60339e-26	0.579634	0.827	0.654	1.46001e-21	C3
MYC	9.02431e-12	0.577759	0.394	0.243	1.99528e-07	C3
FOSL1	2.47071e-23	0.576941	0.702	0.486	5.46274e-19	C3
EMP1	4.76262e-10	0.550206	0.952	0.909	1.05302e-05	C3
C1S	2.68078e-30	0.548246	0.817	0.636	5.9272e-26	C3
SAA2	1.80524e-19	0.547908	0.107	0.024	3.99139e-15	C3
FRMD6	3.23343e-21	0.544979	0.561	0.333	7.14912e-17	C3
ABCA1	3.78907e-39	0.535455	0.18	0.036	8.37763e-35	C3
EFEMP1	7.88067e-37	0.534706	0.311	0.096	1.74242e-32	C3
NOP16	6.64086e-21	0.534109	0.446	0.234	1.46829e-16	C3
MMP3	7.0385e-12	0.531564	0.626	0.469	1.55621e-07	C3
UGDH	2.80087e-14	0.525423	0.848	0.724	6.19272e-10	C3
IER3	0.00152521	0.520656	0.602	0.528	1	C3
FNIP2	3.22384e-14	0.511348	0.433	0.272	7.12791e-10	C3
LRRC15	5.99233e-19	0.511061	0.221	0.083	1.3249e-14	C3
MET	1.58689e-33	0.510448	0.408	0.156	3.50861e-29	C3
RARRES1	1.16817e-23	0.500798	0.28	0.102	2.58283e-19	C3
TNFAIP8	1.72795e-21	0.49775	0.446	0.223	3.8205e-17	C3
CXCL8	1.1411e-20	0.494486	0.412	0.194	2.52297e-16	C3
HIVEP2	3.29879e-18	0.492022	0.651	0.45	7.29362e-14	C3
PARP14	9.67668e-19	0.484845	0.19	0.065	2.13951e-14	C3
HIF1A	1.57802e-16	0.477503	0.827	0.67	3.489e-12	C3
FABP5	0.216452	0.472363	0.232	0.217	1	C3
MT1M	1.84309e-10	0.471528	0.464	0.306	4.07507e-06	C3
PLSCR1	1.16393e-17	0.470105	0.408	0.219	2.57345e-13	C3
SERPING1	1.322e-21	0.466871	0.907	0.857	2.92294e-17	C3
CRTAC1	9.44196e-16	0.466798	0.64	0.455	2.08762e-11	C3
PDE4B	1.12564e-18	0.466428	0.675	0.453	2.4888e-14	C3
SLC39A14	3.93779e-26	0.466035	0.9	0.774	8.70645e-22	C3
ASPN	4.64251e-18	0.462932	0.439	0.225	1.02646e-13	C3
RYBP	7.7092e-11	0.461406	0.706	0.566	1.7045e-06	C3
DAB2	5.66676e-19	0.459964	0.612	0.412	1.25292e-14	C3
PPIF	2.95305e-08	0.459777	0.211	0.114	0.00065292	C3
SEMA3C	2.19149e-13	0.456603	0.505	0.348	4.84539e-09	C3
METTL7A	6.48504e-27	0.450037	0.308	0.113	1.43384e-22	C3
TXNRD1	1.24599e-14	0.449999	0.609	0.416	2.75489e-10	C3
MT2A	2.93421e-16	0.448519	0.972	0.922	6.48754e-12	C3
WDR43	3.85982e-17	0.438078	0.464	0.265	8.53406e-13	C3
PLA2G2A	0.256614	0.437626	0.221	0.264	1	C3
WISP2	2.90414e-78	0.437098	0.128	0.01	6.42105e-74	C3
EPS8	1.7728e-13	0.43147	0.478	0.293	3.91965e-09	C3
ZEB2	2.9102e-20	0.429248	0.242	0.091	6.43444e-16	C3
MT1H	3.03854e-05	0.425644	0.27	0.181	0.671821	C3
MEDAG	1.09281e-08	0.42274	0.336	0.208	0.00024162	C3
MXRA5	5.56941e-10	0.421626	0.332	0.197	1.2314e-05	C3
IFITM3	6.17116e-23	0.418145	0.965	0.901	1.36444e-18	C3
HLA-E	1.73218e-09	0.413311	0.609	0.48	3.82984e-05	C3
ELK3	1.10158e-17	0.412828	0.46	0.259	2.43559e-13	C3
ZFP36L1	2.00851e-14	0.410164	0.557	0.369	4.44081e-10	C3
ARID5B	1.11385e-16	0.408613	0.827	0.664	2.46272e-12	C3
COL8A1	3.55757e-14	0.40565	0.332	0.167	7.86579e-10	C3
SOX4	1.76526e-06	0.404056	0.453	0.33	0.0390299	C3
PMP22	1.0002e-20	0.403318	0.938	0.879	2.21144e-16	C3
CLU	2.19931e-26	0.402372	1	0.996	4.86268e-22	C3
ANTXR1	7.94514e-18	0.402004	0.415	0.216	1.75667e-13	C3
LRRFIP1	1.01386e-11	0.400798	0.761	0.598	2.24164e-07	C3
AKR1C2	1.28889e-05	0.397855	0.394	0.286	0.284974	C3
NFATC2	2.63418e-06	0.396558	0.46	0.36	0.0582417	C3
FHL2	1.51526e-19	0.395125	0.54	0.309	3.35025e-15	C3
GPRC5A	1.94209e-13	0.394045	0.931	0.809	4.29396e-09	C3
SPAG9	1.70715e-11	0.393777	0.74	0.586	3.77452e-07	C3
CACYBP	4.97457e-13	0.393185	0.696	0.553	1.09988e-08	C3
C1R	1.12114e-16	0.391316	0.633	0.43	2.47883e-12	C3
SCARA3	8.20843e-16	0.391261	0.394	0.213	1.81488e-11	C3
OTUD4	2.34823e-14	0.390592	0.235	0.103	5.19195e-10	C3
PLAUR	4.08478e-09	0.389259	0.654	0.501	9.03145e-05	C3
ICAM1	1.18912e-13	0.387993	0.571	0.379	2.62915e-09	C3
NUDT4	1.43655e-10	0.384395	0.474	0.32	3.17622e-06	C3
SACS	3.67843e-08	0.383351	0.235	0.134	0.000813301	C3
BMP2	9.78219e-09	0.383085	0.509	0.377	0.000216284	C3
LMNA	2.28286e-06	0.379598	0.768	0.684	0.0504741	C3
FNDC1	1.68013e-12	0.379387	0.277	0.139	3.71477e-08	C3
AKAP13	1.84758e-12	0.378412	0.495	0.314	4.085e-08	C3
RRP15	1.29079e-05	0.376325	0.273	0.188	0.285395	C3
NPC2	2.3447e-10	0.375453	0.789	0.682	5.18414e-06	C3
IL6ST	4.41937e-14	0.373693	0.775	0.615	9.77123e-10	C3
BACH1	8.24688e-12	0.370337	0.471	0.304	1.82338e-07	C3
ANK2	2.23352e-06	0.370035	0.19	0.11	0.0493832	C3
PEAK1	4.87143e-18	0.364508	0.18	0.061	1.07707e-13	C3
MT1L	1.26693e-06	0.364352	0.426	0.311	0.0280119	C3
CDH11	3.01377e-23	0.360704	0.339	0.14	6.66344e-19	C3
TP53BP2	3.78655e-12	0.360256	0.311	0.169	8.37207e-08	C3
SNTB2	2.35874e-11	0.359898	0.204	0.093	5.21517e-07	C3
TXN	2.42234e-12	0.358183	0.893	0.856	5.35579e-08	C3
FOXP1	2.45684e-13	0.357366	0.453	0.274	5.43208e-09	C3
SERPINF1	1.26869e-20	0.356499	0.131	0.033	2.80508e-16	C3
ENAH	9.78615e-14	0.355534	0.429	0.253	2.16372e-09	C3
EDIL3	4.12601e-12	0.355167	0.657	0.465	9.1226e-08	C3
RAB7A	8.27326e-14	0.355137	0.779	0.668	1.82922e-09	C3
MT1G	0.859844	0.354197	0.433	0.488	1	C3
PTBP3	7.42693e-14	0.353513	0.45	0.266	1.64209e-09	C3
PTGER2	2.38243e-20	0.35223	0.339	0.147	5.26755e-16	C3
B4GALT1	5.58893e-12	0.35219	0.415	0.25	1.23571e-07	C3
CLMP	3.74778e-09	0.351952	0.391	0.251	8.28633e-05	C3
PRRC2C	1.45529e-12	0.350692	0.73	0.586	3.21764e-08	C3
HIVEP1	3.93109e-13	0.350541	0.381	0.215	8.69163e-09	C3
PEA15	4.63523e-12	0.348112	0.581	0.415	1.02485e-07	C3
NRIP1	2.32251e-15	0.343556	0.377	0.198	5.13507e-11	C3
COL1A2	2.52683e-17	0.343267	0.647	0.424	5.58681e-13	C3
COLEC12	8.10881e-12	0.342697	0.232	0.111	1.79286e-07	C3
PITPNB	6.78199e-12	0.342648	0.709	0.544	1.4995e-07	C3
TGFB2	1.37531e-14	0.340249	0.166	0.06	3.04082e-10	C3
JAK1	2.10183e-13	0.339048	0.595	0.415	4.64714e-09	C3
PAXBP1	8.32276e-05	0.338596	0.37	0.286	1	C3
CTSL	5.46765e-09	0.336234	0.706	0.594	0.00012089	C3
ZC3HAV1	0.000706119	0.335102	0.412	0.341	1	C3
CXCL2	8.07719e-07	0.334153	0.277	0.167	0.0178587	C3
ARHGAP21	2.10013e-06	0.331526	0.346	0.247	0.046434	C3
NIFK	8.82069e-11	0.330335	0.54	0.388	1.95026e-06	C3
S100A11	2.99471e-13	0.329585	0.958	0.921	6.6213e-09	C3
SYNJ2	0.000720275	0.327699	0.201	0.137	1	C3
IFITM2	8.0128e-13	0.32721	0.862	0.77	1.77163e-08	C3
FAM180A	2.11193e-05	0.327141	0.187	0.114	0.466948	C3
LTBP2	5.06092e-10	0.326456	0.571	0.415	1.11897e-05	C3
TPST1	5.39234e-11	0.326243	0.388	0.235	1.19225e-06	C3
SLC7A2	0.000600492	0.325213	0.453	0.394	1	C3
TIMP2	3.21863e-12	0.324333	0.734	0.57	7.1164e-08	C3
RORA	5.60588e-08	0.324056	0.408	0.281	0.00123946	C3
LRRC8C	3.21862e-08	0.323551	0.197	0.105	0.000711638	C3
NDRG1	0.00047158	0.323359	0.478	0.416	1	C3
UGCG	5.02063e-12	0.322723	0.273	0.138	1.11006e-07	C3
CSGALNACT2	1.16285e-09	0.321603	0.55	0.411	2.57106e-05	C3
YWHAG	2.99915e-09	0.321542	0.63	0.489	6.63111e-05	C3
ADAMTS5	4.65361e-10	0.319809	0.176	0.079	1.02891e-05	C3
MYO10	6.7165e-10	0.315249	0.381	0.229	1.48502e-05	C3
BIRC3	2.07447e-08	0.315234	0.304	0.178	0.000458666	C3
IPO7	1.52899e-08	0.314171	0.602	0.478	0.00033806	C3
FAM177B	6.17482e-15	0.314097	0.253	0.11	1.36525e-10	C3
NOTCH2	8.7096e-12	0.313735	0.446	0.277	1.92569e-07	C3
SRFBP1	1.29652e-07	0.313579	0.336	0.216	0.00286661	C3
RAB31	8.83105e-09	0.310426	0.374	0.236	0.000195255	C3
PSME2	5.42554e-06	0.310038	0.304	0.207	0.119959	C3
MAFB	3.37487e-10	0.308944	0.329	0.187	7.46184e-06	C3
ZNFX1	2.06081e-11	0.306856	0.388	0.229	4.55646e-07	C3
GPX3	1.63673e-07	0.306614	0.972	0.96	0.00361882	C3
ACSL4	6.90735e-09	0.303537	0.377	0.242	0.000152722	C3
SERPINE2	2.13336e-06	0.298947	0.754	0.715	0.0471687	C3
PTX3	9.1258e-13	0.297672	0.225	0.099	2.01771e-08	C3
RSPO2	0.000123386	0.297503	0.156	0.095	1	C3
GBP1	4.1993e-10	0.295833	0.27	0.142	9.28465e-06	C3
ATP13A3	5.77254e-11	0.29533	0.253	0.129	1.27631e-06	C3
ABHD2	5.04976e-12	0.294052	0.422	0.251	1.1165e-07	C3
GTPBP4	4.49976e-06	0.29396	0.412	0.31	0.0994898	C3
MAP4K4	1.63214e-09	0.293472	0.26	0.138	3.60867e-05	C3
SVIL	1.2171e-12	0.29338	0.394	0.226	2.69102e-08	C3
NOLC1	0.000636376	0.291344	0.526	0.449	1	C3
LTBP1	3.07528e-11	0.287993	0.429	0.256	6.79945e-07	C3
GSTO1	6.91356e-07	0.287467	0.619	0.536	0.0152859	C3
CYLD	5.60015e-08	0.287021	0.464	0.331	0.00123819	C3
GOLM1	3.45537e-07	0.286756	0.578	0.45	0.00763982	C3
ZMIZ1	2.01342e-07	0.286289	0.232	0.134	0.00445167	C3
KDM7A	1.28572e-08	0.28598	0.349	0.215	0.000284272	C3
NAMPT	7.03471e-07	0.285434	0.609	0.492	0.0155537	C3
MAN1A1	4.11875e-09	0.283555	0.329	0.199	9.10656e-05	C3
RBPJ	1.3685e-06	0.283511	0.45	0.331	0.0302575	C3
IFI16	2.79315e-08	0.283401	0.377	0.241	0.000617565	C3
ATP6V1B2	9.97828e-11	0.28325	0.28	0.147	2.2062e-06	C3
SMOC2	0.0900589	0.282511	0.263	0.241	1	C3
STIP1	7.03772e-12	0.281108	0.806	0.666	1.55604e-07	C3
TM4SF1	3.54723e-08	0.280867	0.692	0.537	0.000784292	C3
MAP3K20	2.04582e-10	0.280544	0.311	0.176	4.52331e-06	C3
MYO1B	8.66133e-11	0.280298	0.187	0.085	1.91502e-06	C3
ARL4C	1.79341e-10	0.28015	0.187	0.085	3.96524e-06	C3
APOL6	1.45455e-10	0.280015	0.135	0.052	3.21602e-06	C3
EPAS1	2.76012e-05	0.279122	0.388	0.291	0.610263	C3
2021-09-11	1.79173e-09	0.278917	0.304	0.174	3.96151e-05	C3
COL3A1	1.60858e-17	0.278904	0.73	0.518	3.55658e-13	C3
NAA50	7.64185e-08	0.27872	0.512	0.377	0.00168961	C3
COL14A1	7.89108e-10	0.278427	0.152	0.064	1.74472e-05	C3
ETS1	1.12174e-07	0.278368	0.443	0.315	0.00248017	C3
GSPT1	2.0515e-08	0.278264	0.45	0.31	0.000453588	C3
THBD	5.5222e-09	0.278175	0.187	0.091	0.000122096	C3
EIF5B	8.20332e-07	0.27766	0.678	0.562	0.0181375	C3
AC090498.1	4.63337e-06	0.277608	0.443	0.341	0.102444	C3
GPNMB	7.53175e-14	0.277398	0.159	0.057	1.66527e-09	C3
ITGB1	2.09336e-07	0.276079	0.775	0.661	0.00462841	C3
S100A16	6.0451e-07	0.275841	0.377	0.252	0.0133657	C3
CXCL3	9.6518e-15	0.275349	0.152	0.051	2.13401e-10	C3
FOXO3	4.10851e-05	0.275218	0.384	0.3	0.908392	C3
H3F3A	2.6569e-05	0.273494	0.246	0.165	0.58744	C3
SP100	3.45552e-07	0.272851	0.291	0.184	0.00764016	C3
RSL1D1	6.4139e-11	0.272303	0.824	0.704	1.41811e-06	C3
ST3GAL1	2.33132e-07	0.27212	0.37	0.248	0.00515455	C3
NR3C1	8.11979e-07	0.271805	0.702	0.597	0.0179529	C3
TRIO	1.33231e-06	0.269661	0.149	0.076	0.0294573	C3
XRN2	5.6244e-07	0.266814	0.422	0.303	0.0124355	C3
NIP7	2.23763e-07	0.266381	0.311	0.198	0.00494741	C3
PPP1R14C	7.48503e-05	0.266254	0.194	0.124	1	C3
ADAR	1.44893e-05	0.266201	0.246	0.16	0.320359	C3
BGN	4.45592e-07	0.266123	0.931	0.895	0.00985203	C3
MT1F	0.0568442	0.265126	0.422	0.403	1	C3
PCOLCE	0.00233633	0.263971	0.394	0.333	1	C3
LBH	0.00996443	0.263414	0.664	0.618	1	C3
SERBP1	1.46811e-06	0.262636	0.72	0.609	0.0324598	C3
MT1X	1.21258e-08	0.262382	0.903	0.869	0.000268101	C3
EIF2AK2	1.70192e-06	0.262259	0.277	0.177	0.0376294	C3
TOP1	2.96565e-06	0.26221	0.616	0.496	0.0655706	C3
WHRN	3.3936e-06	0.261732	0.145	0.077	0.0750324	C3
CAST	7.40404e-07	0.261293	0.623	0.507	0.0163703	C3
ALDH1A2	1.45085e-08	0.261104	0.149	0.066	0.000320784	C3
CNN3	3.33674e-07	0.260864	0.481	0.35	0.00737753	C3
CHSY1	3.73117e-06	0.260681	0.308	0.206	0.0824961	C3
EMP2	9.12151e-07	0.26033	0.737	0.62	0.0201677	C3
FAM107B	7.03191e-07	0.259573	0.287	0.178	0.0155475	C3
NFKBIZ	2.01322e-15	0.259509	0.706	0.471	4.45124e-11	C3
RAPGEF2	1.96768e-06	0.258168	0.426	0.308	0.0435055	C3
TRIB1	1.56098e-06	0.257158	0.433	0.306	0.0345133	C3
ACTN1	2.20311e-07	0.256865	0.405	0.28	0.00487108	C3
CMC2	3.02105e-05	0.25637	0.284	0.196	0.667954	C3
EIF3J	1.65675e-07	0.256235	0.671	0.538	0.00366308	C3
FGF7	6.37288e-08	0.256181	0.228	0.123	0.00140904	C3
LRP1	9.43815e-11	0.255171	0.803	0.667	2.08677e-06	C3
DGKI	1.39763e-06	0.254486	0.249	0.152	0.0309016	C3
LARP4	2.80762e-06	0.253077	0.332	0.227	0.0620765	C3
PDPN	1.27979e-05	0.252521	0.64	0.585	0.282962	C3
SLC16A1	8.10892e-07	0.252342	0.571	0.454	0.0179288	C3
PLK2	0.00358874	0.251342	0.433	0.365	1	C3
POSTN	8.60756e-278	1.75657	0.241	0.07	1.90313e-273	C4
COL1A1	0	1.3428	0.321	0.092	0	C4
COL3A1	0	1.30484	0.747	0.486	0	C4
COL1A2	0	1.20292	0.685	0.387	0	C4
SPP1	8.02167e-06	1.09172	0.261	0.24	0.177359	C4
TMSB4X	0	1.07991	0.827	0.676	0	C4
LGALS1	0	1.02646	0.927	0.819	0	C4
MMP13	1.09864e-140	0.845322	0.104	0.025	2.4291e-136	C4
COL6A3	1.65923e-263	0.813133	0.558	0.33	3.66857e-259	C4
MMP14	0	0.793357	0.477	0.231	0	C4
TNC	6.72614e-234	0.77651	0.394	0.177	1.48715e-229	C4
ASPN	5.34899e-39	0.775021	0.299	0.217	1.18266e-34	C4
S100A4	9.57086e-192	0.748851	0.796	0.68	2.11612e-187	C4
TGFBI	2.33589e-202	0.746671	0.408	0.211	5.16466e-198	C4
COL5A2	1.36122e-279	0.731437	0.642	0.382	3.00966e-275	C4
ANTXR1	9.77151e-207	0.649343	0.389	0.192	2.16048e-202	C4
PRSS23	2.34472e-193	0.646896	0.422	0.224	5.18418e-189	C4
MMP2	7.10147e-278	0.64355	0.208	0.052	1.57014e-273	C4
TPM4	2.30029e-213	0.638672	0.764	0.614	5.08594e-209	C4
COL5A1	1.65892e-203	0.635488	0.514	0.299	3.66786e-199	C4
COL6A1	2.47195e-176	0.619046	0.648	0.476	5.46549e-172	C4
ITGB1	4.72999e-223	0.609385	0.791	0.643	1.0458e-218	C4
SULF1	2.07209e-175	0.598346	0.374	0.185	4.5814e-171	C4
TMSB10	9.40695e-175	0.595804	0.851	0.764	2.07988e-170	C4
GJA1	1.68106e-203	0.595235	0.502	0.3	3.71683e-199	C4
THY1	1.29924e-213	0.59413	0.459	0.244	2.87262e-209	C4
SH3BGRL3	1.86925e-142	0.562209	0.809	0.722	4.1329e-138	C4
CALD1	1.921e-226	0.561747	0.621	0.405	4.24734e-222	C4
COL12A1	8.46232e-132	0.553336	0.334	0.172	1.87102e-127	C4
MXRA5	1.2382e-142	0.54871	0.339	0.177	2.73766e-138	C4
COL8A1	5.32651e-117	0.537774	0.29	0.15	1.17769e-112	C4
RAB31	8.67066e-220	0.534147	0.421	0.21	1.91708e-215	C4
COL6A2	3.0252e-175	0.518022	0.531	0.335	6.68873e-171	C4
PFN1	5.26004e-157	0.510602	0.779	0.679	1.16299e-152	C4
CD99	3.81362e-218	0.505909	0.908	0.8	8.43191e-214	C4
SPARC	1.65632e-153	0.501994	0.958	0.882	3.66213e-149	C4
S100A10	4.06122e-149	0.497747	0.954	0.933	8.97936e-145	C4
TPM1	1.0687e-136	0.48704	0.445	0.263	2.3629e-132	C4
CTSB	1.43149e-163	0.486994	0.774	0.664	3.16503e-159	C4
PCOLCE	1.73825e-168	0.485836	0.505	0.307	3.84328e-164	C4
FSTL1	4.23765e-135	0.456887	0.69	0.541	9.36944e-131	C4
LTBP1	2.37501e-173	0.455443	0.426	0.232	5.25115e-169	C4
CAPZB	1.75006e-155	0.44864	0.553	0.377	3.86938e-151	C4
ECM1	1.43038e-227	0.446797	0.42	0.201	3.16257e-223	C4
FBN1	9.60883e-190	0.445813	0.397	0.2	2.12451e-185	C4
COL14A1	5.34454e-180	0.443586	0.168	0.049	1.18168e-175	C4
LRRC15	1.30408e-245	0.43449	0.22	0.064	2.88333e-241	C4
GAPDH	1.85438e-134	0.432802	0.847	0.738	4.10003e-130	C4
CACYBP	1.75726e-78	0.431569	0.64	0.542	3.88531e-74	C4
ISLR	8.51438e-119	0.431443	0.804	0.689	1.88253e-114	C4
TAGLN2	2.56444e-114	0.421904	0.661	0.541	5.66998e-110	C4
GPNMB	6.35406e-234	0.417217	0.171	0.041	1.40488e-229	C4
COL15A1	4.05156e-189	0.39542	0.218	0.075	8.95799e-185	C4
NBL1	2.66177e-210	0.395221	0.25	0.089	5.88518e-206	C4
AEBP1	5.27378e-91	0.387815	0.817	0.736	1.16603e-86	C4
VIM	9.33783e-129	0.384324	0.986	0.976	2.06459e-124	C4
LIMA1	2.22444e-155	0.384174	0.369	0.192	4.91825e-151	C4
IGFBP5	4.55404e-48	0.383929	0.155	0.083	1.0069e-43	C4
2021-09-11	3.18932e-201	0.381471	0.342	0.15	7.05159e-197	C4
MXRA8	6.07567e-111	0.380545	0.419	0.26	1.34333e-106	C4
ANXA2	1.19118e-81	0.378974	0.971	0.968	2.63369e-77	C4
OLFML2B	7.82792e-233	0.378864	0.249	0.083	1.73075e-228	C4
B2M	2.80795e-201	0.377376	0.989	0.988	6.20837e-197	C4
C12orf75	7.7908e-184	0.375967	0.238	0.088	1.72255e-179	C4
CCND1	1.18862e-86	0.373216	0.435	0.293	2.62805e-82	C4
CAPG	2.64849e-107	0.371978	0.449	0.295	5.85581e-103	C4
FAP	1.07474e-144	0.370575	0.445	0.26	2.37625e-140	C4
DAB2	1.74524e-123	0.364027	0.563	0.392	3.85872e-119	C4
ATP5F1E	4.93112e-154	0.362998	0.872	0.791	1.09027e-149	C4
FABP5	1.24605e-61	0.356635	0.314	0.203	2.75501e-57	C4
CTHRC1	4.62484e-219	0.356127	0.233	0.076	1.02255e-214	C4
CDH13	1.62414e-208	0.354943	0.216	0.069	3.59097e-204	C4
CNN3	9.17303e-93	0.354397	0.473	0.333	2.02816e-88	C4
CLMP	8.39404e-139	0.346156	0.405	0.229	1.85592e-134	C4
CDH11	7.20868e-147	0.34543	0.272	0.122	1.59384e-142	C4
CMTM3	3.04896e-128	0.344733	0.376	0.21	6.74126e-124	C4
FRMD6	1.98454e-84	0.342514	0.456	0.317	4.38783e-80	C4
CFL1	4.92453e-99	0.340068	0.795	0.738	1.08881e-94	C4
EDIL3	6.78934e-93	0.336536	0.597	0.447	1.50112e-88	C4
MT-RNR2	2.02155e-44	0.332622	0.991	0.991	4.46966e-40	C4
CD82	4.87721e-103	0.3312	0.373	0.227	1.07835e-98	C4
NREP	1.32394e-115	0.322625	0.311	0.164	2.92724e-111	C4
SERPINH1	5.40793e-92	0.318153	0.496	0.346	1.19569e-87	C4
SMOC1	4.45371e-81	0.315232	0.469	0.336	9.84714e-77	C4
ARL4C	4.19024e-162	0.313882	0.197	0.069	9.26463e-158	C4
ARL6IP5	2.33623e-118	0.313354	0.799	0.683	5.16541e-114	C4
RPS27L	9.28442e-88	0.312753	0.777	0.672	2.05279e-83	C4
MAP1B	2.24436e-147	0.311477	0.235	0.095	4.96227e-143	C4
AHNAK	1.1146e-51	0.30944	0.844	0.769	2.46438e-47	C4
UQCRQ	7.38688e-95	0.307394	0.716	0.585	1.63324e-90	C4
MGST3	9.91846e-94	0.30654	0.645	0.511	2.19297e-89	C4
PTTG1IP	2.28847e-83	0.306409	0.829	0.761	5.05981e-79	C4
AQP1	8.83248e-155	0.30627	0.105	0.023	1.95286e-150	C4
CALU	3.19665e-95	0.306169	0.819	0.747	7.06778e-91	C4
ANPEP	3.20092e-264	0.305705	0.153	0.03	7.07722e-260	C4
ACTR2	8.06822e-101	0.304916	0.603	0.46	1.78388e-96	C4
TPPP3	4.2333e-83	0.304698	0.127	0.05	9.35982e-79	C4
PLS3	5.93232e-84	0.30353	0.604	0.471	1.31164e-79	C4
BGN	5.03158e-74	0.302551	0.934	0.889	1.11248e-69	C4
CD151	3.20697e-81	0.302051	0.482	0.345	7.09062e-77	C4
DKK3	1.11925e-213	0.301335	0.162	0.04	2.47466e-209	C4
FOXP1	1.18059e-84	0.299488	0.394	0.258	2.61029e-80	C4
FNDC1	1.15512e-84	0.299337	0.239	0.126	2.55397e-80	C4
SPOCK1	6.05554e-186	0.298805	0.237	0.086	1.33888e-181	C4
FKBP1A	1.87872e-111	0.298267	0.401	0.244	4.15385e-107	C4
CTSZ	1.08668e-118	0.298263	0.299	0.156	2.40264e-114	C4
HCFC1R1	7.84515e-82	0.2979	0.383	0.247	1.73456e-77	C4
MARCKS	6.22166e-159	0.297017	0.198	0.07	1.37561e-154	C4
MYL12B	4.00594e-97	0.296195	0.775	0.704	8.85713e-93	C4
CTSK	2.82366e-57	0.290302	0.616	0.506	6.24311e-53	C4
ITGA11	1.52103e-77	0.289348	0.42	0.281	3.36301e-73	C4
MYL12A	5.37236e-86	0.289261	0.576	0.443	1.18783e-81	C4
CLIC1	4.217e-83	0.288812	0.679	0.569	9.32378e-79	C4
AP2S1	2.46031e-106	0.287852	0.444	0.282	5.43974e-102	C4
FTH1	6.90793e-33	0.287151	0.743	0.698	1.52734e-28	C4
IGFBP7	8.51812e-83	0.28576	0.629	0.488	1.88336e-78	C4
COX6C	2.02914e-98	0.285075	0.801	0.699	4.48643e-94	C4
GUK1	3.69271e-79	0.28473	0.538	0.401	8.16458e-75	C4
ACTB	1.61279e-30	0.284041	0.959	0.973	3.56589e-26	C4
CRIP2	2.56592e-61	0.283815	0.472	0.352	5.67324e-57	C4
ATP5MF	1.75382e-69	0.281544	0.547	0.42	3.87769e-65	C4
RRAD	2.10955e-36	0.280121	0.249	0.17	4.66423e-32	C4
PPIC	3.17131e-96	0.279518	0.468	0.307	7.01176e-92	C4
MTATP6P1	1.52745e-24	0.27748	0.756	0.746	3.3772e-20	C4
NPC2	4.57078e-54	0.277325	0.76	0.671	1.0106e-49	C4
SCARB2	6.71665e-88	0.276771	0.459	0.316	1.48505e-83	C4
LAMA4	1.82876e-155	0.272808	0.17	0.056	4.04338e-151	C4
KDELR3	1.90069e-72	0.272286	0.446	0.311	4.20242e-68	C4
MYL9	2.21381e-149	0.27196	0.188	0.067	4.89473e-145	C4
CEMIP	4.72889e-96	0.270709	0.137	0.052	1.04556e-91	C4
TIMP1	9.01377e-33	0.267499	0.953	0.938	1.99294e-28	C4
SERF2	1.53273e-126	0.265967	0.968	0.939	3.38887e-122	C4
PDGFRA	5.12534e-93	0.265102	0.31	0.174	1.13321e-88	C4
EMP3	7.88028e-70	0.264369	0.827	0.769	1.74233e-65	C4
GNG11	2.51541e-66	0.264035	0.401	0.277	5.56158e-62	C4
CLEC11A	1.47685e-102	0.263797	0.294	0.159	3.26531e-98	C4
TPM3	7.95792e-58	0.262655	0.622	0.526	1.7595e-53	C4
MT-RNR1	2.10275e-21	0.262301	0.949	0.959	4.64919e-17	C4
HSPA4	4.24258e-63	0.261802	0.462	0.343	9.38034e-59	C4
CD63	1.22773e-152	0.260581	0.969	0.951	2.71451e-148	C4
PTN	1.85109e-169	0.260238	0.139	0.036	4.09276e-165	C4
PPIB	2.26942e-91	0.259916	0.281	0.154	5.01768e-87	C4
MYOF	3.64588e-129	0.258585	0.231	0.1	8.06104e-125	C4
IGFBP3	1.00994e-63	0.254726	0.105	0.042	2.23297e-59	C4
PRRX1	1.50175e-61	0.25406	0.458	0.334	3.32036e-57	C4
SELENOW	8.55223e-64	0.252586	0.631	0.509	1.8909e-59	C4
HTRA1	1.04217e-83	0.252549	0.769	0.664	2.30424e-79	C4
COL11A1	6.12907e-07	0.252499	0.817	0.807	0.0135514	C4
CAST	8.21617e-61	0.250876	0.605	0.494	1.8166e-56	C4
CAVIN3	5.50953e-91	0.250628	0.313	0.178	1.21816e-86	C4
STMN1	0	2.27292	0.791	0.043	0	CPC
HIST1H4C	6.32036e-130	2.08435	0.899	0.649	1.39743e-125	CPC
LGALS1	1.95726e-263	1.92576	0.984	0.829	4.32751e-259	CPC
NUSAP1	0	1.68312	0.703	0.031	0	CPC
TOP2A	0	1.58411	0.619	0.007	0	CPC
HIST1H1B	0	1.56371	0.392	0.008	0	CPC
TUBB	2.10183e-293	1.52751	0.933	0.501	4.64715e-289	CPC
CKAP2	0	1.51051	0.609	0.038	0	CPC
PTTG1	0	1.50803	0.779	0.18	0	CPC
POSTN	5.15631e-123	1.45785	0.347	0.087	1.14006e-118	CPC
HIST1H1A	0	1.39182	0.48	0.068	0	CPC
CENPF	0	1.36968	0.575	0.011	0	CPC
TMSB4X	1.39032e-191	1.29096	0.974	0.689	3.07399e-187	CPC
CDKN3	0	1.26716	0.64	0.062	0	CPC
ANLN	0	1.25021	0.625	0.008	0	CPC
TPX2	0	1.24211	0.589	0.006	0	CPC
PFN1	1.31905e-222	1.21695	0.959	0.686	2.91641e-218	CPC
TPM4	7.04139e-217	1.21594	0.947	0.626	1.55685e-212	CPC
SMC4	0	1.21469	0.728	0.114	0	CPC
PCLAF	0	1.21408	0.671	0.009	0	CPC
BIRC5	0	1.16705	0.583	0.006	0	CPC
HIST1H1E	4.5989e-147	1.15898	0.654	0.25	1.01682e-142	CPC
MKI67	0	1.12963	0.493	0.003	0	CPC
HMGB1	5.22727e-255	1.11464	0.985	0.886	1.15575e-250	CPC
DUT	1.37808e-253	1.09448	0.867	0.366	3.04694e-249	CPC
TK1	0	1.0904	0.657	0.009	0	CPC
PTN	0	1.08681	0.619	0.036	0	CPC
TMEM106C	0	1.08228	0.769	0.152	0	CPC
HIST1H1C	3.92725e-78	1.07002	0.684	0.375	8.68315e-74	CPC
PBK	0	1.05249	0.578	0.002	0	CPC
CDK1	0	1.04967	0.571	0.003	0	CPC
TMSB10	1.68496e-175	1.04785	0.977	0.771	3.72545e-171	CPC
COL6A3	1.62684e-207	1.02628	0.849	0.349	3.59694e-203	CPC
TYMS	0	1.02378	0.634	0.01	0	CPC
PMAIP1	3.16468e-70	1.02255	0.305	0.097	6.99711e-66	CPC
UBE2T	0	1.01865	0.612	0.014	0	CPC
UBE2C	0	0.992381	0.505	0.005	0	CPC
TIMP1	4.2229e-60	0.987222	0.975	0.939	9.33684e-56	CPC
SH3BGRL3	6.30941e-135	0.975478	0.94	0.729	1.39501e-130	CPC
TAGLN2	3.55038e-181	0.973146	0.908	0.549	7.84989e-177	CPC
PCNA	0	0.971958	0.7	0.164	0	CPC
CLIC1	1.51375e-180	0.967324	0.908	0.576	3.3469e-176	CPC
CENPW	0	0.96531	0.6	0.012	0	CPC
CENPU	0	0.964228	0.57	0.011	0	CPC
H2AFZ	2.5488e-218	0.936278	0.991	0.894	5.6354e-214	CPC
NUCKS1	2.178e-192	0.925507	0.972	0.761	4.81555e-188	CPC
HMGN2	6.63816e-189	0.919884	0.898	0.488	1.4677e-184	CPC
DHFR	0	0.914493	0.609	0.017	0	CPC
ACTB	1.10608e-136	0.909435	0.997	0.971	2.44554e-132	CPC
CAPG	5.64868e-216	0.900137	0.801	0.304	1.24892e-211	CPC
CENPK	0	0.896222	0.627	0.022	0	CPC
CKS2	3.4738e-176	0.875357	0.821	0.356	7.68058e-172	CPC
CCNB1	0	0.875277	0.406	0.037	0	CPC
TPM3	5.76377e-178	0.854225	0.912	0.53	1.27437e-173	CPC
H2AFV	1.08875e-199	0.854054	0.884	0.425	2.40722e-195	CPC
GAPDH	1.55027e-135	0.845017	0.958	0.748	3.42765e-131	CPC
VIM	6.1269e-136	0.8386	0.996	0.977	1.35466e-131	CPC
CFL1	6.0269e-174	0.82814	0.962	0.74	1.33255e-169	CPC
HMMR	0	0.820503	0.416	0.003	0	CPC
PRSS23	9.08571e-162	0.807413	0.681	0.24	2.00885e-157	CPC
IKBIP	8.00609e-245	0.800232	0.72	0.209	1.77015e-240	CPC
CENPX	0	0.797332	0.633	0.102	0	CPC
IFIT3	1.43802e-34	0.791982	0.161	0.053	3.17947e-30	CPC
KIF11	0	0.786493	0.485	0.006	0	CPC
DBI	3.7606e-156	0.778397	0.94	0.617	8.31469e-152	CPC
ITGB1	1.29936e-115	0.77384	0.936	0.656	2.87289e-111	CPC
MAD2L1	0	0.769309	0.556	0.018	0	CPC
CACYBP	2.63613e-128	0.769033	0.895	0.547	5.82849e-124	CPC
CEP55	0	0.768867	0.407	0.002	0	CPC
CKS1B	3.07469e-281	0.768777	0.716	0.184	6.79814e-277	CPC
SMC2	0	0.767293	0.592	0.065	0	CPC
RANBP1	7.70067e-211	0.766732	0.703	0.226	1.70262e-206	CPC
CCNB2	0	0.766009	0.435	0.006	0	CPC
ANXA2	3.34501e-141	0.760599	0.999	0.968	7.39582e-137	CPC
MYL12A	3.1398e-141	0.758461	0.837	0.452	6.94209e-137	CPC
SKA2	0	0.757736	0.602	0.075	0	CPC
KLF6	8.8653e-52	0.75281	0.783	0.531	1.96012e-47	CPC
ISG15	3.48545e-50	0.749675	0.214	0.067	7.70634e-46	CPC
RRAD	2.66472e-62	0.748538	0.419	0.174	5.89169e-58	CPC
COL6A1	1.05745e-99	0.748409	0.837	0.491	2.33802e-95	CPC
ATAD2	0	0.745081	0.52	0.056	0	CPC
CAVIN3	1.50706e-204	0.742515	0.638	0.185	3.33211e-200	CPC
PPIA	5.9535e-188	0.74072	0.985	0.884	1.31632e-183	CPC
CD82	4.19515e-169	0.730958	0.675	0.236	9.27548e-165	CPC
TGFBI	1.53916e-119	0.723901	0.613	0.228	3.40308e-115	CPC
CKAP2L	0	0.723712	0.467	0.002	0	CPC
C12orf75	2.47155e-282	0.720618	0.531	0.098	5.4646e-278	CPC
ARPC5	2.3574e-136	0.71872	0.827	0.445	5.21222e-132	CPC
PLP2	6.19844e-139	0.718669	0.922	0.592	1.37047e-134	CPC
ESCO2	0	0.715869	0.407	0.001	0	CPC
S100A10	1.193e-105	0.710744	0.994	0.934	2.63771e-101	CPC
RACGAP1	0	0.709362	0.508	0.025	0	CPC
DLGAP5	0	0.706098	0.307	0.001	0	CPC
KIF20B	0	0.70439	0.423	0.021	0	CPC
RRM2	0	0.702621	0.441	0.003	0	CPC
S100A4	7.67971e-62	0.696189	0.903	0.691	1.69798e-57	CPC
ECT2	0	0.695362	0.469	0.02	0	CPC
NUCB2	3.20586e-115	0.694606	0.977	0.825	7.08816e-111	CPC
TTK	0	0.687439	0.404	0.005	0	CPC
EMP3	8.33429e-140	0.685863	0.966	0.772	1.84271e-135	CPC
DTYMK	0	0.683999	0.531	0.053	0	CPC
ECM1	2.31286e-231	0.680422	0.748	0.217	5.11372e-227	CPC
TMPO	0	0.680198	0.616	0.102	0	CPC
RRM1	0	0.676202	0.599	0.113	0	CPC
DNMT1	0	0.675889	0.53	0.069	0	CPC
ANAPC11	1.85282e-137	0.67473	0.862	0.451	4.09657e-133	CPC
MCM4	0	0.67003	0.515	0.066	0	CPC
CCDC34	0	0.665303	0.48	0.057	0	CPC
ASPM	0	0.663953	0.296	0.002	0	CPC
PTMS	5.09043e-143	0.658378	0.682	0.259	1.12549e-138	CPC
COL6A2	3.04187e-97	0.65595	0.723	0.352	6.72557e-93	CPC
HMGB3	1.28903e-295	0.655575	0.455	0.071	2.85005e-291	CPC
DEK	7.15266e-116	0.649518	0.886	0.574	1.58145e-111	CPC
MYL12B	2.11737e-117	0.648383	0.943	0.708	4.68151e-113	CPC
PTTG1IP	2.32029e-80	0.640816	0.952	0.766	5.13017e-76	CPC
CDC20	0	0.635509	0.346	0.007	0	CPC
CALU	6.63462e-103	0.632065	0.946	0.752	1.46691e-98	CPC
NUF2	0	0.629283	0.395	0.001	0	CPC
PSME2	1.04396e-213	0.628857	0.684	0.196	2.30819e-209	CPC
CBX3	2.64016e-127	0.628331	0.902	0.561	5.83738e-123	CPC
HINT1	3.70329e-105	0.627091	0.941	0.768	8.18798e-101	CPC
MTATP6P1	4.1558e-70	0.626997	0.899	0.744	9.18847e-66	CPC
RAD21	3.96041e-102	0.626475	0.837	0.512	8.75647e-98	CPC
UBE2S	2.31091e-97	0.624108	0.701	0.328	5.10943e-93	CPC
SPDL1	0	0.620598	0.46	0.067	0	CPC
HMGB2	2.18958e-85	0.620532	0.78	0.438	4.84116e-81	CPC
GGH	0	0.618835	0.558	0.074	0	CPC
HACD3	1.88839e-162	0.617197	0.747	0.282	4.17523e-158	CPC
ENO1	6.90214e-110	0.612819	0.985	0.909	1.52606e-105	CPC
BUB3	1.01397e-131	0.608198	0.75	0.324	2.24189e-127	CPC
CENPE	0	0.606282	0.29	0.01	0	CPC
DIAPH3	0	0.605053	0.408	0.004	0	CPC
MCM7	0	0.604707	0.529	0.06	0	CPC
CD151	2.10797e-107	0.604283	0.742	0.354	4.66072e-103	CPC
NT5E	9.60235e-105	0.600426	0.788	0.402	2.12308e-100	CPC
BUB1	0	0.596514	0.394	0.002	0	CPC
MGST3	8.97797e-120	0.592766	0.889	0.521	1.98503e-115	CPC
HMGB1P5	3.00554e-190	0.589626	0.663	0.198	6.64524e-186	CPC
SLC25A5	6.42782e-106	0.588094	0.874	0.541	1.42119e-101	CPC
ARPC2	2.24646e-115	0.586715	0.972	0.824	4.96693e-111	CPC
TPI1	4.66274e-102	0.585013	0.982	0.893	1.03093e-97	CPC
CRIP2	1.1596e-105	0.584447	0.757	0.358	2.56387e-101	CPC
CBX1	7.68693e-117	0.583678	0.698	0.295	1.69958e-112	CPC
CENPN	0	0.583099	0.473	0.027	0	CPC
NDC80	0	0.582577	0.372	0.003	0	CPC
MT-CO2	9.72418e-89	0.581692	0.943	0.903	2.15002e-84	CPC
SPC25	0	0.58091	0.375	0.001	0	CPC
CENPM	0	0.579784	0.411	0.004	0	CPC
COX8A	1.27995e-103	0.577469	0.859	0.49	2.82996e-99	CPC
CLEC11A	6.01951e-157	0.575751	0.567	0.167	1.33091e-152	CPC
YWHAH	2.34191e-127	0.573907	0.652	0.25	5.17797e-123	CPC
HIST1H1D	6.7486e-269	0.572489	0.18	0.012	1.49211e-264	CPC
RHOC	2.12212e-93	0.572061	0.832	0.492	4.69201e-89	CPC
SGO2	0	0.571385	0.385	0.023	0	CPC
FXYD5	1.36742e-98	0.569895	0.943	0.695	3.02336e-94	CPC
RAC1	1.25048e-91	0.56878	0.796	0.445	2.76481e-87	CPC
FAP	4.95e-144	0.568038	0.725	0.274	1.09445e-139	CPC
COL15A1	1.34135e-180	0.567371	0.413	0.086	2.96573e-176	CPC
AP2S1	4.72787e-129	0.566781	0.716	0.293	1.04533e-124	CPC
GMNN	1.69187e-174	0.562978	0.549	0.148	3.74073e-170	CPC
HELLS	0	0.562963	0.426	0.032	0	CPC
KIF23	0	0.562271	0.375	0.007	0	CPC
MZT2B	2.37093e-124	0.559398	0.673	0.264	5.24213e-120	CPC
SIVA1	3.95083e-101	0.558191	0.726	0.341	8.73528e-97	CPC
SELENOW	1.06161e-93	0.557841	0.848	0.518	2.34722e-89	CPC
MYL6	2.59944e-106	0.556235	0.99	0.914	5.74735e-102	CPC
BANF1	3.93509e-112	0.555477	0.873	0.494	8.70049e-108	CPC
MSN	3.02861e-76	0.554931	0.881	0.625	6.69625e-72	CPC
GINS2	0	0.552787	0.403	0.014	0	CPC
HP1BP3	1.33529e-89	0.549528	0.845	0.51	2.95234e-85	CPC
YBX1	2.94539e-75	0.549469	0.936	0.738	6.51226e-71	CPC
RHEB	1.08617e-96	0.544625	0.826	0.492	2.40151e-92	CPC
ERLIN1	6.78608e-195	0.544435	0.537	0.131	1.5004e-190	CPC
HIST1H3B	0	0.543943	0.297	0.003	0	CPC
ADGRG2	3.01794e-119	0.541054	0.42	0.123	6.67266e-115	CPC
MMP14	9.77972e-130	0.538913	0.673	0.254	2.1623e-125	CPC
JPT1	7.22353e-101	0.538424	0.605	0.242	1.59712e-96	CPC
CCND1	3.58889e-80	0.537609	0.66	0.303	7.93504e-76	CPC
FANCI	0	0.537524	0.422	0.006	0	CPC
ACOT7	1.29396e-285	0.533284	0.464	0.075	2.86095e-281	CPC
PGAM1	3.16112e-119	0.531218	0.542	0.186	6.98923e-115	CPC
CLSPN	0	0.530412	0.334	0.015	0	CPC
PSMA7	2.1929e-112	0.526791	0.988	0.925	4.84851e-108	CPC
THY1	1.08594e-79	0.525356	0.59	0.265	2.401e-75	CPC
2021-09-07	8.6994e-90	0.524278	0.928	0.733	1.92344e-85	CPC
NCAPG	0	0.522424	0.354	0.002	0	CPC
SUMO2	7.22496e-99	0.519162	0.917	0.661	1.59744e-94	CPC
MYBL1	0	0.519084	0.426	0.032	0	CPC
RPA3	1.83056e-120	0.516943	0.706	0.293	4.04737e-116	CPC
VPS29	8.92976e-116	0.515422	0.726	0.317	1.97437e-111	CPC
SULF1	5.66033e-54	0.515304	0.448	0.204	1.2515e-49	CPC
CDCA3	0	0.511957	0.343	0.001	0	CPC
PSIP1	8.44465e-188	0.510208	0.568	0.148	1.86711e-183	CPC
CAPZB	1.44744e-97	0.509896	0.769	0.392	3.20029e-93	CPC
TNC	1.82862e-182	0.509694	0.673	0.195	4.04308e-178	CPC
CENPH	0	0.506698	0.442	0.022	0	CPC
LSM4	1.14935e-255	0.506458	0.546	0.11	2.54122e-251	CPC
CD59	3.38951e-62	0.505968	0.917	0.726	7.4942e-58	CPC
ACTN4	3.86435e-112	0.502959	0.571	0.209	8.54407e-108	CPC
FAM111A	1.72172e-261	0.502336	0.442	0.073	3.80672e-257	CPC
YWHAQ	1.34583e-90	0.501166	0.936	0.714	2.97564e-86	CPC
MT-CO1	6.13933e-68	0.500617	0.952	0.937	1.35741e-63	CPC
CDCA8	0	0.500066	0.309	0.004	0	CPC
ZFR	2.62899e-48	0.498094	0.779	0.511	5.8127e-44	CPC
ATP5MF	3.9212e-89	0.496596	0.81	0.428	8.66978e-85	CPC
ACTG1	6.01201e-67	0.491051	0.993	0.956	1.32925e-62	CPC
ARL2	4.85583e-138	0.490455	0.63	0.218	1.07363e-133	CPC
B2M	1.34479e-84	0.490397	0.991	0.988	2.97334e-80	CPC
NUDT1	0	0.490241	0.444	0.058	0	CPC
PSMA4	1.87589e-87	0.487945	0.801	0.443	4.1476e-83	CPC
KNL1	0	0.487437	0.31	0.002	0	CPC
PRR11	0	0.484643	0.294	0.004	0	CPC
SMOC1	2.25958e-85	0.484333	0.7	0.345	4.99594e-81	CPC
MELK	0	0.483723	0.385	0.002	0	CPC
DDX39A	2.59553e-148	0.483196	0.555	0.167	5.73871e-144	CPC
GPX4	6.13332e-72	0.483076	0.887	0.592	1.35608e-67	CPC
GUK1	3.87882e-90	0.482385	0.776	0.41	8.57606e-86	CPC
DCLK1	1.03108e-187	0.481547	0.108	0.006	2.27973e-183	CPC
TPGS2	1.53619e-213	0.480505	0.548	0.126	3.39651e-209	CPC
PIMREG	0	0.480319	0.351	0.003	0	CPC
IFIT1	2.14784e-32	0.479358	0.102	0.027	4.74888e-28	CPC
FKBP1A	5.33966e-107	0.479173	0.637	0.256	1.1806e-102	CPC
TUBG1	0	0.478575	0.403	0.038	0	CPC
HMGN1	1.33074e-107	0.478555	0.693	0.297	2.94227e-103	CPC
MT-CO3	1.30121e-61	0.478173	0.941	0.929	2.87697e-57	CPC
SKA3	0	0.477803	0.369	0.002	0	CPC
CDKN2D	2.23705e-248	0.475771	0.335	0.046	4.94613e-244	CPC
SNRPG	2.9634e-82	0.474892	0.915	0.654	6.55208e-78	CPC
ANP32E	1.03389e-92	0.474853	0.691	0.325	2.28594e-88	CPC
ANGPTL4	1.48939e-46	0.474351	0.496	0.251	3.29304e-42	CPC
MAP1B	1.71885e-111	0.471924	0.387	0.107	3.80038e-107	CPC
PTMA	8.50688e-115	0.471691	1	0.997	1.88087e-110	CPC
ITGB3BP	2.93712e-245	0.471249	0.473	0.086	6.49397e-241	CPC
ADAM12	2.11155e-303	0.470358	0.366	0.044	4.66863e-299	CPC
TBCB	8.34678e-100	0.468699	0.788	0.382	1.84547e-95	CPC
DEPDC1	0	0.467928	0.303	0.001	0	CPC
MRPL18	1.14303e-56	0.467838	0.795	0.498	2.52723e-52	CPC
GAS2L3	0	0.46762	0.284	0.01	0	CPC
CALM3	1.5393e-109	0.464953	0.556	0.197	3.40338e-105	CPC
MT-ATP6	3.40701e-75	0.461216	0.937	0.917	7.5329e-71	CPC
FBN1	4.91398e-84	0.459301	0.552	0.219	1.08648e-79	CPC
NCAPG2	0	0.458758	0.395	0.017	0	CPC
AP2M1	5.50362e-88	0.458725	0.779	0.402	1.21685e-83	CPC
CDH13	8.95482e-139	0.458547	0.359	0.082	1.97991e-134	CPC
HIST1H2AJ	0	0.458329	0.199	0.001	0	CPC
RAB31	4.10794e-106	0.455381	0.608	0.229	9.08265e-102	CPC
RUVBL2	2.55891e-208	0.454332	0.441	0.087	5.65774e-204	CPC
TUBB6	8.92273e-94	0.454172	0.619	0.262	1.97282e-89	CPC
H2AFY	1.54728e-195	0.453019	0.54	0.129	3.42103e-191	CPC
BUB1B	0	0.452823	0.312	0.001	0	CPC
FADS1	3.99055e-131	0.452239	0.483	0.141	8.82311e-127	CPC
COX7A2	2.3233e-77	0.452091	0.965	0.807	5.13681e-73	CPC
IRF1	5.25641e-21	0.450804	0.467	0.285	1.16219e-16	CPC
UQCRQ	4.05788e-78	0.450694	0.898	0.595	8.97196e-74	CPC
EZH2	2.28387e-179	0.450692	0.454	0.1	5.04964e-175	CPC
MCM3	1.88976e-292	0.450331	0.379	0.049	4.17826e-288	CPC
NQO1	3.52194e-122	0.450061	0.536	0.173	7.78702e-118	CPC
CNIH4	6.68998e-87	0.449407	0.723	0.352	1.47915e-82	CPC
RAD51AP1	0	0.448581	0.332	0.005	0	CPC
ARHGAP11A	0	0.448155	0.305	0.007	0	CPC
PKM	1.20921e-76	0.44794	0.974	0.875	2.67355e-72	CPC
GSTO1	1.97138e-68	0.447882	0.839	0.529	4.35873e-64	CPC
SHCBP1	0	0.447421	0.351	0.001	0	CPC
UQCC2	1.36256e-161	0.447172	0.559	0.156	3.01262e-157	CPC
MT-CYB	1.13553e-61	0.445487	0.939	0.919	2.51066e-57	CPC
TIMP3	1.10697e-22	0.445287	0.801	0.599	2.44752e-18	CPC
ARL4A	6.50999e-90	0.444921	0.416	0.135	1.43936e-85	CPC
CKAP5	1.87214e-117	0.44377	0.46	0.139	4.13931e-113	CPC
SMS	4.50794e-140	0.443553	0.48	0.134	9.96706e-136	CPC
ANP32B	2.40831e-76	0.442572	0.789	0.437	5.32478e-72	CPC
COL1A1	2.10476e-63	0.440782	0.335	0.117	4.65361e-59	CPC
MZT1	3.21255e-156	0.439249	0.54	0.149	7.10294e-152	CPC
FSTL1	6.72247e-55	0.438171	0.855	0.553	1.48634e-50	CPC
VDAC1	4.10429e-75	0.437966	0.914	0.617	9.07458e-71	CPC
CIB1	1.11299e-82	0.436855	0.701	0.334	2.46083e-78	CPC
DNAJC9	4.35835e-231	0.436179	0.41	0.069	9.63632e-227	CPC
GNG11	3.71439e-81	0.435962	0.638	0.285	8.21251e-77	CPC
S100A2	1.75308e-31	0.434661	0.287	0.129	3.87605e-27	CPC
SUMO3	3.69328e-111	0.434159	0.631	0.242	8.16583e-107	CPC
MYH9	1.04192e-88	0.433784	0.537	0.207	2.30368e-84	CPC
PHPT1	2.21463e-78	0.433094	0.78	0.417	4.89655e-74	CPC
ISLR	2.51601e-51	0.432996	0.899	0.7	5.56289e-47	CPC
ATP5MC3	2.94397e-75	0.432933	0.858	0.535	6.50912e-71	CPC
NDUFB2	1.36479e-70	0.432879	0.878	0.565	3.01755e-66	CPC
RPL39L	0	0.432167	0.391	0.034	0	CPC
EIF5A	2.67253e-55	0.432127	0.615	0.326	5.90897e-51	CPC
FLOT1	2.16389e-89	0.430694	0.621	0.271	4.78436e-85	CPC
DUSP1	2.27484e-16	0.43027	0.501	0.353	5.02967e-12	CPC
KIF2C	0	0.429716	0.266	0.003	0	CPC
KPNA2	2.43019e-45	0.429155	0.505	0.257	5.37315e-41	CPC
ZWINT	0	0.428645	0.363	0.011	0	CPC
DRAP1	1.55563e-97	0.427318	0.613	0.25	3.43951e-93	CPC
ORC6	0	0.425748	0.367	0.021	0	CPC
GADD45GIP1	2.59501e-74	0.424894	0.605	0.271	5.73757e-70	CPC
TMOD3	3.48638e-100	0.424334	0.587	0.224	7.70839e-96	CPC
CAPNS1	3.88589e-87	0.424124	0.574	0.238	8.59169e-83	CPC
CMC2	1.2776e-116	0.423601	0.556	0.188	2.82477e-112	CPC
CBX5	7.69524e-67	0.423304	0.827	0.503	1.70142e-62	CPC
HAUS1	3.5906e-165	0.422736	0.46	0.109	7.93881e-161	CPC
MZT2A	1.03227e-133	0.422541	0.517	0.154	2.28235e-129	CPC
EIF4EBP1	1.52789e-118	0.422467	0.492	0.153	3.37815e-114	CPC
FAM111B	0	0.422392	0.245	0.006	0	CPC
GNAI2	2.21612e-79	0.4211	0.785	0.426	4.89984e-75	CPC
CMTM3	3.04156e-81	0.420876	0.548	0.225	6.7249e-77	CPC
FABP5	2.95638e-139	0.420545	0.627	0.208	6.53655e-135	CPC
SKA1	0	0.419566	0.302	0.001	0	CPC
CSE1L	8.26715e-201	0.418473	0.488	0.105	1.82787e-196	CPC
CDC6	0	0.417665	0.327	0.01	0	CPC
USP1	1.901e-89	0.416259	0.561	0.223	4.20312e-85	CPC
FADS2	1.01395e-235	0.415461	0.354	0.053	2.24185e-231	CPC
SGCB	3.19663e-73	0.415102	0.808	0.463	7.06775e-69	CPC
CD47	4.28298e-91	0.415005	0.688	0.304	9.46967e-87	CPC
TXN	3.37419e-81	0.414659	0.978	0.854	7.46034e-77	CPC
CCT5	4.73741e-65	0.412727	0.748	0.427	1.04744e-60	CPC
C3orf14	2.69902e-286	0.41245	0.353	0.044	5.96754e-282	CPC
PCMT1	4.78953e-94	0.411498	0.672	0.29	1.05896e-89	CPC
PCOLCE	1.62688e-72	0.411419	0.669	0.325	3.59703e-68	CPC
EXOSC8	1.86403e-122	0.411319	0.562	0.186	4.12137e-118	CPC
SYNE2	5.32629e-241	0.411254	0.316	0.041	1.17764e-236	CPC
COMMD4	2.71229e-205	0.410869	0.406	0.075	5.99688e-201	CPC
CALM2	2.11084e-51	0.410361	0.994	0.962	4.66706e-47	CPC
KIF5B	2.55658e-50	0.410173	0.837	0.556	5.65259e-46	CPC
BRCA2	0	0.408935	0.319	0.024	0	CPC
CTSZ	3.60784e-115	0.4076	0.514	0.167	7.97694e-111	CPC
FBXO5	1.82577e-147	0.407579	0.275	0.048	4.03677e-143	CPC
ICMT	6.42454e-263	0.407275	0.407	0.062	1.42046e-258	CPC
DCTN3	4.40253e-86	0.406697	0.609	0.261	9.73399e-82	CPC
PSMB3	1.26181e-80	0.406669	0.811	0.438	2.78985e-76	CPC
NDUFB6	8.65014e-81	0.405741	0.811	0.441	1.91255e-76	CPC
DTL	0	0.405179	0.306	0.002	0	CPC
SERPINE2	2.03769e-39	0.404868	0.909	0.711	4.50534e-35	CPC
NDUFA6	2.69233e-65	0.404844	0.807	0.484	5.95275e-61	CPC
SPCS3	1.06935e-81	0.404641	0.665	0.308	2.36433e-77	CPC
RFC2	5.54073e-266	0.404538	0.389	0.056	1.22505e-261	CPC
IGFBP7	8.12661e-42	0.402711	0.78	0.5	1.79679e-37	CPC
RAB13	1.36472e-64	0.402417	0.688	0.357	3.01739e-60	CPC
SLBP	1.16301e-94	0.401184	0.505	0.183	2.5714e-90	CPC
NUTF2	4.58227e-104	0.401153	0.612	0.234	1.01314e-99	CPC
CCL2	1.0883e-79	0.400827	0.198	0.042	2.40622e-75	CPC
ATP6V0B	1.48139e-67	0.400806	0.729	0.39	3.27535e-63	CPC
ATP5F1E	3.3341e-67	0.400029	0.962	0.798	7.37169e-63	CPC
PSMC3	1.39576e-87	0.399869	0.624	0.266	3.08602e-83	CPC
NCAPD3	2.05399e-305	0.39943	0.372	0.045	4.54137e-301	CPC
ACTR2	5.00499e-62	0.398431	0.817	0.471	1.1066e-57	CPC
KDELC2	1.47903e-119	0.398395	0.539	0.176	3.27013e-115	CPC
SPATS2L	8.75641e-82	0.396926	0.637	0.28	1.93604e-77	CPC
LSM3	4.18441e-81	0.396367	0.735	0.362	9.25172e-77	CPC
CARHSP1	4.5553e-170	0.395773	0.449	0.104	1.00718e-165	CPC
ACTR3	3.93756e-65	0.395495	0.758	0.422	8.70594e-61	CPC
ATP5PD	6.6401e-65	0.395068	0.839	0.53	1.46813e-60	CPC
MIS18BP1	8.68641e-174	0.394786	0.408	0.085	1.92056e-169	CPC
CALD1	1.8484e-53	0.394364	0.742	0.426	4.08681e-49	CPC
MRPL51	1.33908e-66	0.393569	0.859	0.536	2.9607e-62	CPC
NDUFS8	1.07883e-109	0.393196	0.52	0.174	2.38529e-105	CPC
TREM1	7.40667e-108	0.393052	0.306	0.074	1.63762e-103	CPC
PPM1G	2.05576e-109	0.392743	0.502	0.164	4.54528e-105	CPC
KIFC1	0	0.392451	0.293	0.003	0	CPC
RNH1	1.34794e-93	0.392408	0.575	0.225	2.9803e-89	CPC
ATL3	7.312e-78	0.392031	0.616	0.276	1.61668e-73	CPC
YWHAB	1.95564e-64	0.391737	0.862	0.552	4.32391e-60	CPC
PCSK1	2.91432e-99	0.390765	0.268	0.062	6.44356e-95	CPC
TXNDC17	4.98587e-80	0.389745	0.719	0.339	1.10238e-75	CPC
PAICS	1.55841e-100	0.388759	0.54	0.193	3.44563e-96	CPC
COL5A1	4.50799e-62	0.388512	0.643	0.319	9.96717e-58	CPC
SYPL1	3.90086e-85	0.387998	0.673	0.304	8.6248e-81	CPC
CYB5R3	1.64402e-59	0.387555	0.845	0.532	3.63492e-55	CPC
SAE1	1.73526e-205	0.386645	0.423	0.081	3.83665e-201	CPC
RCN2	5.58755e-60	0.385505	0.698	0.387	1.23541e-55	CPC
KIF4A	0	0.384668	0.259	0.005	0	CPC
XRCC5	3.33108e-54	0.384089	0.871	0.608	7.36501e-50	CPC
ZWILCH	0	0.384047	0.387	0.041	0	CPC
NAP1L4	2.12047e-82	0.383705	0.682	0.309	4.68835e-78	CPC
HIST1H2AH	0	0.38354	0.22	0.008	0	CPC
RAN	8.28574e-67	0.381736	0.966	0.839	1.83198e-62	CPC
MTND1P23	1.92076e-210	0.381519	0.126	0.007	4.24679e-206	CPC
HPRT1	2.715e-133	0.381257	0.518	0.153	6.00285e-129	CPC
PALLD	2.61815e-104	0.381011	0.395	0.114	5.78873e-100	CPC
POLD2	5.63732e-101	0.380775	0.461	0.15	1.24641e-96	CPC
LAMTOR2	4.35108e-86	0.379421	0.586	0.237	9.62023e-82	CPC
PRDX3	3.13781e-81	0.378635	0.694	0.327	6.93769e-77	CPC
TMEM50A	2.02141e-74	0.378217	0.788	0.413	4.46933e-70	CPC
ACADVL	1.068e-90	0.378205	0.534	0.203	2.36135e-86	CPC
LDHB	1.09804e-58	0.378199	0.823	0.541	2.42777e-54	CPC
SMC1A	5.94566e-125	0.377991	0.495	0.146	1.31459e-120	CPC
DNAJC15	9.94813e-67	0.377891	0.75	0.401	2.19953e-62	CPC
HJURP	0	0.377209	0.245	0	0	CPC
OLFML2B	8.4367e-117	0.377177	0.376	0.098	1.86535e-112	CPC
SRP9	2.08599e-63	0.377071	0.845	0.561	4.61213e-59	CPC
UBE2L3	4.75976e-59	0.37683	0.758	0.431	1.05238e-54	CPC
COX5A	2.66543e-69	0.37567	0.732	0.383	5.89327e-65	CPC
IL11	2.06446e-61	0.375544	0.259	0.078	4.56451e-57	CPC
PDCD5	1.15686e-63	0.375216	0.823	0.487	2.55782e-59	CPC
AGTRAP	3.70634e-98	0.375176	0.46	0.152	8.19472e-94	CPC
MASTL	5.85114e-218	0.374949	0.367	0.06	1.29369e-213	CPC
MDH1	2.45146e-65	0.373416	0.75	0.405	5.42018e-61	CPC
PRKDC	2.14001e-71	0.372636	0.574	0.252	4.73157e-67	CPC
S100A11	6.71453e-59	0.372102	0.98	0.92	1.48458e-54	CPC
ACTN1	2.58928e-77	0.371663	0.621	0.273	5.7249e-73	CPC
MAD2L2	1.20296e-181	0.371164	0.398	0.079	2.65975e-177	CPC
RALB	1.2376e-104	0.370557	0.527	0.181	2.73632e-100	CPC
CD44	6.26849e-58	0.370325	0.893	0.598	1.38596e-53	CPC
COX6C	2.92147e-54	0.370316	0.937	0.708	6.45938e-50	CPC
AURKAIP1	1.62143e-101	0.369936	0.498	0.17	3.58498e-97	CPC
2021-09-11	3.25264e-121	0.369761	0.533	0.167	7.19158e-117	CPC
BCAP29	7.53541e-65	0.369253	0.722	0.384	1.66608e-60	CPC
ARHGDIB	1.89964e-123	0.3681	0.34	0.079	4.20011e-119	CPC
PLAU	2.32286e-134	0.368077	0.184	0.025	5.13585e-130	CPC
NFKBIA	3.07102e-19	0.367727	0.755	0.565	6.79002e-15	CPC
CTSL	4.01327e-18	0.367534	0.772	0.591	8.87335e-14	CPC
NSD2	0	0.367229	0.34	0.036	0	CPC
S100A16	4.28533e-58	0.367214	0.536	0.247	9.47487e-54	CPC
CTSB	9.92054e-42	0.367209	0.899	0.673	2.19343e-37	CPC
NDUFAF3	1.53463e-61	0.367137	0.662	0.336	3.39307e-57	CPC
ATP6AP2	9.17506e-77	0.366846	0.731	0.364	2.02861e-72	CPC
BSG	6.73272e-65	0.366612	0.766	0.426	1.4886e-60	CPC
POLR2L	1.77958e-53	0.365114	0.874	0.587	3.93466e-49	CPC
VKORC1	3.62178e-47	0.364928	0.842	0.563	8.00776e-43	CPC
UFD1	2.04825e-93	0.364266	0.552	0.207	4.52868e-89	CPC
CD58	8.44277e-81	0.364133	0.508	0.201	1.8667e-76	CPC
CCNA2	0	0.363415	0.237	0.004	0	CPC
2021-09-02	1.01185e-60	0.362923	0.751	0.417	2.2372e-56	CPC
VRK1	1.12452e-265	0.362874	0.363	0.048	2.48631e-261	CPC
GTSE1	0	0.362398	0.239	0.003	0	CPC
ELOVL1	1.30384e-135	0.361739	0.444	0.117	2.88279e-131	CPC
BARD1	6.48586e-186	0.36131	0.391	0.074	1.43402e-181	CPC
BRCA1	0	0.360972	0.313	0.014	0	CPC
TMEM97	4.17063e-207	0.360611	0.376	0.064	9.22126e-203	CPC
SNRPB	5.23597e-73	0.359792	0.736	0.375	1.15767e-68	CPC
PSMD14	1.26437e-71	0.358927	0.703	0.343	2.79552e-67	CPC
RFC4	2.72694e-247	0.358722	0.329	0.043	6.02927e-243	CPC
GTF3A	6.44385e-81	0.358581	0.504	0.195	1.42473e-76	CPC
GALNT7	6.01628e-89	0.357997	0.438	0.149	1.3302e-84	CPC
HPF1	7.29074e-96	0.357996	0.507	0.177	1.61198e-91	CPC
BDKRB1	1.88698e-67	0.357671	0.277	0.083	4.17211e-63	CPC
RBX1	4.82313e-64	0.357388	0.782	0.44	1.0664e-59	CPC
MGME1	3.28876e-239	0.356773	0.359	0.052	7.27145e-235	CPC
MT-ATP8	3.12711e-43	0.356175	0.779	0.511	6.91405e-39	CPC
NDUFB1	6.24771e-55	0.355422	0.795	0.461	1.38137e-50	CPC
AURKA	5.48447e-247	0.355229	0.195	0.015	1.21262e-242	CPC
RECQL	3.90593e-88	0.354568	0.631	0.261	8.63601e-84	CPC
BLOC1S1	6.29792e-106	0.35443	0.485	0.155	1.39247e-101	CPC
MTCH2	1.71497e-128	0.354165	0.482	0.139	3.7918e-124	CPC
KNSTRN	0	0.353776	0.218	0.011	0	CPC
SNRPC	4.16618e-63	0.353652	0.704	0.37	9.21142e-59	CPC
HTRA1	2.28755e-58	0.350894	0.925	0.672	5.05777e-54	CPC
FAM96A	1.96597e-99	0.350446	0.499	0.17	4.34676e-95	CPC
MAP4K4	6.88139e-94	0.350154	0.417	0.132	1.52147e-89	CPC
TM4SF1	2.0137e-57	0.349321	0.827	0.532	4.4523e-53	CPC
MCUB	3.57779e-81	0.349308	0.553	0.226	7.91049e-77	CPC
PMM1	9.50519e-155	0.348669	0.407	0.092	2.1016e-150	CPC
JUN	2.45798e-10	0.348288	0.785	0.663	5.4346e-06	CPC
APLP2	1.16244e-52	0.347614	0.792	0.483	2.57015e-48	CPC
PPP1R14B	4.00713e-137	0.347021	0.327	0.069	8.85976e-133	CPC
GLO1	3.14835e-56	0.346534	0.726	0.41	6.96101e-52	CPC
COX6A1	4.84301e-51	0.346358	0.848	0.565	1.07079e-46	CPC
MANF	7.29231e-71	0.3463	0.672	0.321	1.61233e-66	CPC
ANPEP	3.13969e-112	0.344965	0.224	0.042	6.94185e-108	CPC
NDUFS6	1.03523e-71	0.344766	0.589	0.261	2.28889e-67	CPC
RTN4	9.67745e-50	0.343749	0.878	0.621	2.13968e-45	CPC
LSM5	1.06162e-63	0.34357	0.69	0.349	2.34724e-59	CPC
LTBP1	1.36055e-64	0.342196	0.561	0.251	3.00817e-60	CPC
ITGA5	4.50936e-83	0.341281	0.502	0.189	9.97019e-79	CPC
CRNDE	6.16709e-83	0.340848	0.48	0.176	1.36354e-78	CPC
SNRPD2	3.82409e-52	0.340816	0.927	0.725	8.45506e-48	CPC
SH3KBP1	2.39513e-63	0.340712	0.574	0.264	5.29564e-59	CPC
TPRKB	1.10344e-72	0.340633	0.627	0.283	2.43971e-68	CPC
ELOB	3.94191e-50	0.340564	0.909	0.662	8.71556e-46	CPC
ATP5MD	2.11015e-50	0.339267	0.88	0.589	4.66554e-46	CPC
S100A3	2.03004e-124	0.339047	0.284	0.058	4.48841e-120	CPC
HAT1	1.74854e-69	0.338877	0.609	0.277	3.86602e-65	CPC
PSMD8	4.80434e-54	0.338713	0.795	0.492	1.06224e-49	CPC
PIN1	6.7948e-183	0.338368	0.387	0.074	1.50233e-178	CPC
BOLA3	2.9217e-108	0.337813	0.523	0.171	6.45989e-104	CPC
UQCRC1	5.15753e-100	0.337555	0.514	0.177	1.14033e-95	CPC
NDUFA12	4.34448e-76	0.33736	0.663	0.299	9.60563e-72	CPC
IER2	1.04639e-08	0.336548	0.507	0.381	0.000231357	CPC
COPS9	2.33293e-51	0.336518	0.821	0.513	5.1581e-47	CPC
RAB32	2.62938e-84	0.336382	0.445	0.156	5.81356e-80	CPC
WDR34	2.24021e-213	0.335858	0.35	0.055	4.9531e-209	CPC
TMEM14C	1.52944e-54	0.334372	0.78	0.465	3.3816e-50	CPC
TECR	9.097e-87	0.333765	0.562	0.221	2.01135e-82	CPC
FIBP	1.38018e-108	0.333654	0.457	0.141	3.05159e-104	CPC
NAA38	1.0743e-59	0.333312	0.712	0.376	2.37529e-55	CPC
PLAUR	6.3237e-47	0.332584	0.789	0.496	1.39817e-42	CPC
CTNNAL1	3.73289e-56	0.332515	0.741	0.413	8.25343e-52	CPC
DECR1	8.00277e-73	0.33225	0.615	0.272	1.76941e-68	CPC
RSU1	1.97574e-86	0.331405	0.502	0.184	4.36836e-82	CPC
LMAN1	2.93436e-41	0.331397	0.852	0.582	6.48787e-37	CPC
SLC25A39	1.6819e-127	0.330911	0.406	0.104	3.71867e-123	CPC
NME1	4.85414e-60	0.330907	0.597	0.292	1.07325e-55	CPC
GNG5	2.63093e-47	0.330827	0.864	0.613	5.81698e-43	CPC
FDPS	2.68039e-160	0.330574	0.319	0.059	5.92633e-156	CPC
OAZ1	9.99359e-55	0.329994	0.965	0.833	2.20958e-50	CPC
RDX	1.28213e-62	0.32952	0.628	0.302	2.8348e-58	CPC
TIMM10	7.09856e-77	0.328834	0.543	0.219	1.56949e-72	CPC
CDC42	2.30653e-45	0.328511	0.93	0.733	5.09973e-41	CPC
SNX7	1.18483e-110	0.328389	0.48	0.149	2.61967e-106	CPC
COL1A2	3.21326e-71	0.328379	0.754	0.418	7.10451e-67	CPC
HMGN3	2.4014e-70	0.327027	0.619	0.281	5.30949e-66	CPC
TEX30	1.37104e-109	0.326906	0.411	0.117	3.03137e-105	CPC
MTCH1	8.37795e-75	0.326555	0.584	0.253	1.85236e-70	CPC
SURF4	2.3608e-55	0.326388	0.606	0.305	5.21972e-51	CPC
LRR1	0	0.325467	0.287	0.026	0	CPC
RHOA	3.78855e-61	0.325354	0.99	0.869	8.37649e-57	CPC
ARL6IP1	3.73742e-26	0.324885	0.798	0.589	8.26343e-22	CPC
PHTF2	3.44824e-106	0.324808	0.479	0.149	7.62406e-102	CPC
ITGAE	8.85501e-103	0.324154	0.441	0.135	1.95784e-98	CPC
2021-09-10	3.89114e-61	0.323874	0.676	0.347	8.60331e-57	CPC
CALM1	2.1847e-48	0.323642	0.996	0.97	4.83037e-44	CPC
SMC3	4.7946e-61	0.322444	0.574	0.264	1.06009e-56	CPC
PSMC5	8.01367e-68	0.32238	0.594	0.272	1.77182e-63	CPC
SIGMAR1	1.41341e-114	0.32232	0.432	0.123	3.12504e-110	CPC
NUDCD2	3.77786e-92	0.321958	0.406	0.126	8.35285e-88	CPC
STX2	1.53624e-102	0.32183	0.373	0.104	3.39662e-98	CPC
HSPB11	1.71511e-69	0.32118	0.555	0.238	3.7921e-65	CPC
KIF20A	0	0.320973	0.199	0.001	0	CPC
PTMAP2	3.57828e-58	0.320722	0.682	0.348	7.91157e-54	CPC
HSPA4	2.60505e-50	0.319736	0.653	0.352	5.75977e-46	CPC
HINT2	1.56716e-98	0.319357	0.425	0.131	3.46499e-94	CPC
SSRP1	9.22531e-97	0.319352	0.517	0.179	2.03972e-92	CPC
PPP1CA	2.88356e-129	0.318202	0.391	0.097	6.37554e-125	CPC
RPL26L1	1.76761e-58	0.318145	0.558	0.261	3.90818e-54	CPC
MRPL23	2.75986e-85	0.317546	0.375	0.118	6.10204e-81	CPC
BRI3	7.49442e-50	0.317459	0.449	0.204	1.65702e-45	CPC
PARK7	6.01579e-46	0.317299	0.893	0.648	1.33009e-41	CPC
MND1	0	0.317137	0.239	0.001	0	CPC
ALCAM	5.88827e-58	0.316932	0.193	0.051	1.3019e-53	CPC
PSMD2	1.27453e-69	0.316767	0.534	0.225	2.81799e-65	CPC
LY6E	9.29562e-63	0.316707	0.672	0.33	2.05526e-58	CPC
CTHRC1	4.31212e-109	0.316346	0.353	0.091	9.53409e-105	CPC
KIF14	0	0.316202	0.256	0.008	0	CPC
MAP3K20	1.75616e-92	0.316146	0.492	0.17	3.88287e-88	CPC
SNRPD3	2.00233e-52	0.31594	0.673	0.364	4.42716e-48	CPC
PSMB6	1.97408e-48	0.315911	0.755	0.452	4.36469e-44	CPC
YIF1B	6.31152e-93	0.315814	0.397	0.122	1.39548e-88	CPC
CRLF1	1.17879e-59	0.31573	0.353	0.131	2.60629e-55	CPC
LMNA	8.2054e-26	0.31464	0.868	0.681	1.81421e-21	CPC
ECHS1	5.74525e-59	0.314358	0.548	0.256	1.27028e-54	CPC
RBBP7	4.10415e-75	0.314311	0.668	0.296	9.07426e-71	CPC
VDAC3	2.00034e-93	0.313813	0.523	0.187	4.42276e-89	CPC
CSTB	8.25319e-28	0.313621	0.867	0.644	1.82478e-23	CPC
HDGF	4.8291e-76	0.313379	0.469	0.176	1.06771e-71	CPC
ARPC1B	9.8886e-159	0.313112	0.324	0.061	2.18637e-154	CPC
HSBP1	4.52248e-47	0.312593	0.867	0.583	9.99921e-43	CPC
HIGD1A	4.48096e-65	0.312398	0.638	0.302	9.9074e-61	CPC
COPRS	1.99768e-68	0.311918	0.559	0.244	4.41686e-64	CPC
BCAP31	1.61833e-52	0.311229	0.646	0.342	3.57814e-48	CPC
C5orf15	8.81008e-54	0.311113	0.587	0.287	1.94791e-49	CPC
ARL3	3.4e-63	0.310695	0.722	0.369	7.51741e-59	CPC
ARNTL2	2.38383e-174	0.310292	0.261	0.038	5.27064e-170	CPC
MRPL41	4.98253e-79	0.310252	0.496	0.188	1.10164e-74	CPC
RFC3	0	0.310155	0.265	0.016	0	CPC
CENPQ	1.42244e-226	0.310099	0.341	0.049	3.14502e-222	CPC
CLTA	2.75559e-58	0.310073	0.676	0.351	6.09261e-54	CPC
TSPAN3	1.31814e-50	0.310039	0.654	0.351	2.9144e-46	CPC
OLFM1	1.50274e-132	0.310037	0.321	0.068	3.32255e-128	CPC
MRPS16	1.35669e-88	0.309928	0.466	0.16	2.99964e-84	CPC
ASF1B	0	0.309805	0.271	0.009	0	CPC
MCM6	5.74735e-195	0.309006	0.3	0.045	1.27074e-190	CPC
GOLM1	1.28354e-45	0.30845	0.745	0.444	2.8379e-41	CPC
TKT	3.18775e-50	0.308283	0.531	0.258	7.04811e-46	CPC
NRM	0	0.308224	0.278	0.017	0	CPC
ERH	1.23547e-42	0.308203	0.823	0.543	2.73162e-38	CPC
AP1S2	2.02043e-97	0.30748	0.445	0.142	4.46716e-93	CPC
CISD2	1.17906e-98	0.307112	0.467	0.153	2.6069e-94	CPC
TPM2	8.40425e-51	0.306721	0.624	0.321	1.85818e-46	CPC
STMP1	1.96915e-50	0.306421	0.649	0.345	4.35378e-46	CPC
CBR1	6.39967e-89	0.306175	0.463	0.158	1.41497e-84	CPC
FOXP1	4.20821e-45	0.305135	0.539	0.27	9.30435e-41	CPC
PARP1	1.61819e-93	0.303482	0.357	0.102	3.57783e-89	CPC
NDUFB10	1.71667e-54	0.303222	0.637	0.326	3.79555e-50	CPC
NEK2	0	0.30315	0.212	0.001	0	CPC
ATP5F1B	1.29741e-43	0.30269	0.839	0.584	2.86857e-39	CPC
CISD1	5.52418e-85	0.302312	0.436	0.148	1.2214e-80	CPC
ZNF367	0	0.302043	0.234	0.004	0	CPC
MRPL52	1.64999e-61	0.301317	0.599	0.279	3.64813e-57	CPC
NDUFA4	3.81828e-39	0.300508	0.918	0.751	8.44222e-35	CPC
PSME1	6.93441e-81	0.300077	0.531	0.203	1.5332e-76	CPC
ATP5PF	1.39285e-45	0.299816	0.903	0.673	3.0796e-41	CPC
GGCT	6.85317e-90	0.299368	0.384	0.117	1.51524e-85	CPC
MT-RNR1	1.38565e-19	0.298773	0.971	0.958	3.06366e-15	CPC
TFDP1	3.86336e-137	0.298347	0.344	0.075	8.54188e-133	CPC
PA2G4	7.6731e-55	0.298343	0.665	0.348	1.69652e-50	CPC
TMEM18	1.86371e-95	0.297281	0.445	0.141	4.12066e-91	CPC
TOPBP1	6.92581e-139	0.296736	0.372	0.083	1.5313e-134	CPC
GPAA1	1.4332e-97	0.296724	0.432	0.135	3.16881e-93	CPC
LRRCC1	5.30162e-132	0.296535	0.34	0.074	1.17219e-127	CPC
TMEM109	1.00444e-85	0.296433	0.47	0.164	2.22081e-81	CPC
HNRNPR	1.08188e-38	0.295958	0.734	0.453	2.39204e-34	CPC
HIST2H2AC	1.06772e-28	0.295866	0.346	0.175	2.36072e-24	CPC
SGO1	0	0.295644	0.225	0.001	0	CPC
PLIN2	1.47037e-34	0.294915	0.413	0.205	3.25098e-30	CPC
PRC1	0	0.294465	0.236	0.003	0	CPC
FDFT1	2.30274e-51	0.294346	0.539	0.259	5.09136e-47	CPC
NEDD8	6.78379e-45	0.29434	0.745	0.443	1.4999e-40	CPC
RALBP1	2.44527e-63	0.294226	0.536	0.232	5.4065e-59	CPC
XPO1	1.29709e-70	0.294022	0.546	0.228	2.86787e-66	CPC
TPPP3	1.84885e-31	0.293558	0.165	0.058	4.08781e-27	CPC
CENPJ	1.4606e-248	0.293479	0.265	0.028	3.22938e-244	CPC
PTGR1	4.70287e-98	0.293062	0.493	0.166	1.0398e-93	CPC
CYC1	2.58735e-64	0.292973	0.441	0.174	5.72062e-60	CPC
MAGOHB	2.12291e-79	0.29286	0.461	0.166	4.69375e-75	CPC
ENG	8.97994e-100	0.29262	0.413	0.124	1.98546e-95	CPC
HHIP	1.053e-191	0.292546	0.12	0.007	2.32818e-187	CPC
SQLE	4.16054e-45	0.292514	0.619	0.334	9.19896e-41	CPC
SNRPD1	5.6812e-51	0.292366	0.789	0.464	1.25611e-46	CPC
ANTXR2	2.01351e-158	0.29191	0.258	0.04	4.45186e-154	CPC
PDZD11	1.67036e-83	0.291552	0.46	0.161	3.69316e-79	CPC
RBBP8	2.17839e-85	0.291002	0.381	0.119	4.81642e-81	CPC
HCFC1R1	1.11563e-52	0.290993	0.552	0.258	2.46665e-48	CPC
PARPBP	0	0.290815	0.25	0.005	0	CPC
ILF2	1.87623e-43	0.290345	0.716	0.416	4.14834e-39	CPC
SET	3.31548e-39	0.290243	0.795	0.514	7.33053e-35	CPC
PHF19	3.90948e-243	0.290201	0.302	0.037	8.64387e-239	CPC
ATP5F1C	4.42572e-52	0.290041	0.758	0.417	9.78527e-48	CPC
TACC3	0	0.288833	0.242	0.005	0	CPC
NCAM1	0	0.287785	0.227	0.012	0	CPC
MT-ND4L	1.01958e-31	0.287706	0.917	0.834	2.25429e-27	CPC
TMEM14A	1.18571e-65	0.287433	0.534	0.229	2.6216e-61	CPC
FUCA2	7.15975e-60	0.287355	0.622	0.298	1.58302e-55	CPC
UBE2I	2.83986e-57	0.287095	0.628	0.307	6.27893e-53	CPC
MINOS1	2.11205e-69	0.286888	0.583	0.248	4.66975e-65	CPC
IDH2	6.63864e-145	0.286779	0.388	0.087	1.4678e-140	CPC
MCM5	0	0.286459	0.225	0.011	0	CPC
MAP4	1.7539e-38	0.286367	0.773	0.475	3.87787e-34	CPC
LMF2	2.61976e-201	0.286104	0.319	0.049	5.79228e-197	CPC
SPAG5	0	0.286064	0.269	0.02	0	CPC
NDUFB11	2.65758e-44	0.285474	0.751	0.451	5.8759e-40	CPC
MTHFD1	2.12148e-173	0.285373	0.309	0.052	4.6906e-169	CPC
PHLDA2	2.90738e-39	0.285305	0.663	0.394	6.42822e-35	CPC
CNN3	1.53006e-52	0.284473	0.663	0.344	3.38297e-48	CPC
DUSP23	6.08498e-97	0.28443	0.325	0.086	1.34539e-92	CPC
GSTP1	1.54683e-39	0.284392	0.975	0.909	3.42005e-35	CPC
DYNC1I2	2.40215e-48	0.284069	0.669	0.354	5.31115e-44	CPC
NBL1	1.67004e-97	0.283784	0.367	0.104	3.69246e-93	CPC
IQGAP3	0	0.28363	0.218	0.004	0	CPC
NCAPD2	0	0.283264	0.247	0.015	0	CPC
PAFAH1B3	8.69832e-219	0.282758	0.247	0.028	1.9232e-214	CPC
CCT8	6.36311e-47	0.282522	0.773	0.455	1.40688e-42	CPC
SRM	2.52824e-60	0.282444	0.29	0.097	5.58993e-56	CPC
POLR2J	4.61549e-53	0.282334	0.603	0.298	1.02048e-48	CPC
AKR1B1	6.32759e-48	0.282155	0.558	0.269	1.39903e-43	CPC
CIP2A	0	0.281938	0.25	0.016	0	CPC
CYB5A	2.95868e-78	0.281871	0.454	0.162	6.54165e-74	CPC
FLNA	3.38207e-64	0.281497	0.498	0.207	7.47776e-60	CPC
ACAA2	2.49952e-80	0.281144	0.512	0.193	5.52645e-76	CPC
FAM192A	1.10006e-66	0.280888	0.395	0.143	2.43224e-62	CPC
CD99	1.55084e-32	0.280593	0.96	0.811	3.4289e-28	CPC
ARPC3	1.0533e-37	0.280325	0.851	0.582	2.32886e-33	CPC
BPGM	1.37285e-46	0.280177	0.719	0.403	3.03537e-42	CPC
TALDO1	6.252e-36	0.279788	0.681	0.412	1.38232e-31	CPC
MSH2	1.58846e-143	0.27965	0.303	0.058	3.51207e-139	CPC
GNB4	9.3694e-146	0.279256	0.284	0.051	2.07157e-141	CPC
RPN1	3.55966e-55	0.278681	0.647	0.322	7.87041e-51	CPC
GADD45A	7.86664e-34	0.27811	0.713	0.454	1.73932e-29	CPC
CCT7	6.19873e-55	0.276729	0.608	0.299	1.37054e-50	CPC
TUSC3	5.21853e-104	0.275809	0.411	0.12	1.15382e-99	CPC
RTN3	8.39741e-43	0.275329	0.72	0.414	1.85667e-38	CPC
MDH2	5.60983e-52	0.275019	0.606	0.298	1.24033e-47	CPC
TMEM160	3.75908e-143	0.274645	0.325	0.065	8.31133e-139	CPC
TXNDC9	6.7282e-90	0.27438	0.483	0.165	1.4876e-85	CPC
RCN3	6.91846e-43	0.274245	0.543	0.274	1.52967e-38	CPC
IMMT	1.53567e-85	0.274037	0.429	0.141	3.39536e-81	CPC
AP2B1	8.36012e-66	0.273855	0.476	0.188	1.84842e-61	CPC
PSMB2	5.13655e-50	0.273248	0.703	0.382	1.13569e-45	CPC
RALY	3.17298e-87	0.27316	0.505	0.179	7.01546e-83	CPC
IFT22	7.21548e-77	0.272953	0.42	0.146	1.59534e-72	CPC
RNASEH2B	2.54655e-144	0.272793	0.302	0.057	5.63043e-140	CPC
COX6B1	1.28393e-34	0.272692	0.908	0.686	2.83877e-30	CPC
NRIP3	3.38328e-103	0.272662	0.303	0.073	7.48044e-99	CPC
CD63	5.29866e-48	0.272569	0.984	0.953	1.17153e-43	CPC
PSMB7	3.17685e-46	0.271827	0.731	0.412	7.02402e-42	CPC
RPA2	7.41277e-101	0.271204	0.414	0.122	1.63896e-96	CPC
MRPS15	1.69239e-59	0.271065	0.469	0.195	3.74188e-55	CPC
CHEK1	7.70951e-208	0.270788	0.259	0.032	1.70457e-203	CPC
CCT6A	9.4431e-37	0.270764	0.824	0.554	2.08787e-32	CPC
PDLIM7	4.65375e-65	0.270519	0.379	0.139	1.02894e-60	CPC
CAV1	8.67887e-31	0.270406	0.846	0.607	1.9189e-26	CPC
UBE2V2	4.55348e-48	0.270316	0.662	0.353	1.00677e-43	CPC
ISOC2	3.98563e-99	0.270236	0.362	0.099	8.81223e-95	CPC
CGAS	1.98633e-102	0.270074	0.319	0.08	4.39177e-98	CPC
CYBA	1.33538e-46	0.270027	0.369	0.156	2.95253e-42	CPC
MEA1	3.54237e-77	0.269656	0.403	0.137	7.83219e-73	CPC
CAPN2	1.02558e-50	0.269519	0.616	0.307	2.26757e-46	CPC
HIGD2A	9.44826e-80	0.269272	0.428	0.148	2.08901e-75	CPC
CCND3	3.45199e-123	0.269254	0.35	0.082	7.63235e-119	CPC
COPE	8.81946e-56	0.268784	0.65	0.324	1.94998e-51	CPC
UCHL5	2.85632e-81	0.268586	0.376	0.118	6.31531e-77	CPC
VCL	7.35902e-46	0.268226	0.574	0.291	1.62708e-41	CPC
TGM2	1.91402e-42	0.267351	0.486	0.235	4.23189e-38	CPC
MT-ND4	2.41175e-36	0.267287	0.946	0.93	5.33239e-32	CPC
RFC5	5.00278e-303	0.267214	0.291	0.028	1.10612e-298	CPC
SCARB2	4.84834e-57	0.266927	0.662	0.327	1.07197e-52	CPC
PSMB5	2.34395e-40	0.266827	0.753	0.46	5.18248e-36	CPC
TIPRL	8.12941e-62	0.266467	0.546	0.238	1.79741e-57	CPC
RASSF1	9.1413e-105	0.26642	0.287	0.066	2.02114e-100	CPC
AXL	3.34242e-77	0.266331	0.328	0.099	7.3901e-73	CPC
MRPL14	3.39552e-75	0.266284	0.495	0.187	7.5075e-71	CPC
WASHC3	1.83305e-59	0.266154	0.553	0.245	4.05287e-55	CPC
LSM2	1.49076e-66	0.265991	0.536	0.221	3.29608e-62	CPC
SUCLG1	6.3523e-42	0.265932	0.735	0.436	1.40449e-37	CPC
UQCRFS1	1.01708e-52	0.265805	0.556	0.265	2.24877e-48	CPC
C19orf48	3.31117e-132	0.265706	0.262	0.048	7.32099e-128	CPC
S100A6	9.22603e-29	0.265639	0.994	0.991	2.03988e-24	CPC
NDUFB4	1.94505e-29	0.264742	0.857	0.618	4.3005e-25	CPC
LMO7	2.05071e-147	0.264566	0.283	0.05	4.53412e-143	CPC
CDCA5	0	0.264211	0.236	0.002	0	CPC
ESD	2.86998e-46	0.263788	0.688	0.377	6.34553e-42	CPC
TXNL4A	8.29022e-51	0.263652	0.508	0.234	1.83297e-46	CPC
PAXX	2.48448e-124	0.263649	0.287	0.059	5.49318e-120	CPC
PSMD1	5.87013e-49	0.263274	0.616	0.312	1.29789e-44	CPC
DPM2	3.72859e-67	0.263066	0.385	0.138	8.24392e-63	CPC
NRP2	6.43211e-24	0.262721	0.682	0.454	1.42214e-19	CPC
PTGES3	5.188e-35	0.262447	0.937	0.752	1.14707e-30	CPC
PDAP1	1.29649e-50	0.262374	0.589	0.287	2.86653e-46	CPC
MT-ND1	2.07444e-28	0.262289	0.924	0.891	4.58659e-24	CPC
RB1	3.02723e-106	0.262177	0.351	0.09	6.69322e-102	CPC
P4HB	1.74294e-39	0.26183	0.679	0.396	3.85364e-35	CPC
TNFRSF12A	3.71015e-13	0.26167	0.81	0.677	8.20315e-09	CPC
STAT1	4.06053e-80	0.261651	0.417	0.14	8.97783e-76	CPC
ARPC1A	8.34138e-80	0.261203	0.467	0.167	1.84428e-75	CPC
AURKB	0	0.260914	0.209	0	0	CPC
KIF15	0	0.26058	0.19	0.001	0	CPC
PRIM1	4.72548e-175	0.260071	0.25	0.035	1.0448e-170	CPC
KIF5C	1.39649e-224	0.259824	0.189	0.016	3.08763e-220	CPC
MCUR1	3.10152e-106	0.259472	0.322	0.079	6.85746e-102	CPC
DYNLRB1	2.63914e-37	0.259399	0.729	0.436	5.83513e-33	CPC
CD81	1.96261e-36	0.259113	0.754	0.463	4.33933e-32	CPC
IFNAR1	4.0117e-46	0.259027	0.539	0.264	8.86987e-42	CPC
BAX	2.79628e-109	0.259027	0.332	0.082	6.18257e-105	CPC
KDELR3	1.15961e-42	0.258987	0.606	0.322	2.56389e-38	CPC
EBP	2.87191e-184	0.258976	0.278	0.04	6.34978e-180	CPC
GLRX3	2.35e-59	0.258737	0.546	0.242	5.19584e-55	CPC
CKAP4	6.36663e-68	0.258393	0.514	0.207	1.40766e-63	CPC
TCF19	0	0.258381	0.231	0.006	0	CPC
GMPS	1.87709e-80	0.258216	0.37	0.117	4.15025e-76	CPC
C1GALT1	1.5193e-49	0.258032	0.419	0.181	3.35917e-45	CPC
PRAF2	6.53954e-51	0.257654	0.524	0.243	1.44589e-46	CPC
PRG4	1.72339e-29	0.25763	0.763	0.601	3.81041e-25	CPC
TRIP13	0	0.257339	0.234	0.004	0	CPC
TMX1	7.55184e-56	0.257151	0.587	0.274	1.66971e-51	CPC
UBE2A	4.80043e-47	0.256623	0.751	0.431	1.06138e-42	CPC
WDR76	5.80209e-291	0.256574	0.224	0.017	1.28284e-286	CPC
PTP4A2	9.65883e-49	0.255069	0.536	0.258	2.13557e-44	CPC
TMCO3	1.35435e-49	0.254616	0.511	0.239	2.99447e-45	CPC
FAM114A1	3.59895e-35	0.254484	0.805	0.513	7.95729e-31	CPC
PPP2R5C	2.35488e-45	0.254271	0.411	0.182	5.20663e-41	CPC
VDAC2	7.81878e-40	0.254085	0.77	0.477	1.72873e-35	CPC
IGFBP5	8.06683e-28	0.25384	0.215	0.09	1.78358e-23	CPC
NENF	6.52597e-35	0.253654	0.609	0.349	1.44289e-30	CPC
HNRNPAB	2.81349e-37	0.253479	0.558	0.299	6.22062e-33	CPC
BCL7C	1.85836e-102	0.253305	0.297	0.071	4.10883e-98	CPC
PLOD1	3.04879e-59	0.252723	0.533	0.231	6.74087e-55	CPC
PPIB	1.25148e-46	0.252385	0.384	0.166	2.76702e-42	CPC
POLR2E	1.74373e-78	0.252274	0.426	0.146	3.85539e-74	CPC
ETFA	1.04645e-55	0.252076	0.451	0.189	2.31371e-51	CPC
LMAN2	4.86319e-49	0.251957	0.586	0.289	1.07525e-44	CPC
AQP1	1.38942e-49	0.251351	0.136	0.032	3.072e-45	CPC
DCTN2	5.87676e-70	0.251214	0.422	0.154	1.29935e-65	CPC
SNX6	1.96919e-48	0.251024	0.669	0.351	4.35387e-44	CPC
CEP89	2.14069e-89	0.250672	0.325	0.089	4.73307e-85	CPC
CDK6	2.27308e-62	0.250659	0.249	0.073	5.02578e-58	CPC
LCN2	1.55479e-18	0.250016	0.234	0.121	3.43765e-14	CPC
MYLK	1.8e-78	1.27979	0.559	0.175	3.98e-74	FCP
TRIB3	0	1.1003	0.451	0.029	0	FCP
TCEA1	1.66e-42	0.855616	0.734	0.465	3.67e-38	FCP
ATF3	4.59e-18	0.789008	0.836	0.715	1.01e-13	FCP
ATF5	1.55e-54	0.780311	0.283	0.064	3.43e-50	FCP
SYNE1	3.92e-36	0.759713	0.636	0.348	8.67e-32	FCP
GOT1	1.21e-38	0.759644	0.413	0.158	2.66e-34	FCP
GDF15	6.8e-223	0.757713	0.297	0.02	1.5e-218	FCP
CYR61	1.76e-26	0.737963	0.881	0.808	3.9e-22	FCP
DEPP1	4.48e-14	0.724948	0.455	0.284	9.92e-10	FCP
IGF2-2	5.63e-13	0.706676	0.252	0.12	1.24e-08	FCP
HSPA9	4.94e-41	0.693146	0.909	0.749	1.09e-36	FCP
FAM129A	1.61e-51	0.619895	0.322	0.082	3.56e-47	FCP
FHL2	2.46e-24	0.617509	0.538	0.309	5.43e-20	FCP
IARS	9.51e-33	0.604577	0.622	0.351	2.1e-28	FCP
CLGN	2.32e-259	0.598341	0.178	0.006	5.12e-255	FCP
RHOB	6.37e-15	0.59287	0.629	0.476	1.41e-10	FCP
BEX2	7.3e-41	0.587459	0.339	0.103	1.61e-36	FCP
MFAP4	9.24e-15	0.58469	0.283	0.142	2.04e-10	FCP
MAP1B	3.7e-36	0.58123	0.336	0.111	8.19e-32	FCP
SARS	5.82e-29	0.554944	0.706	0.456	1.29e-24	FCP
DNAJB9	8.66e-12	0.54867	0.633	0.533	1.92e-07	FCP
TXNIP	2.05e-05	0.547508	0.486	0.393	0.452899	FCP
ULBP1	3.13e-08	0.540746	0.458	0.349	0.000692432	FCP
CEBPG	4.59e-25	0.53848	0.678	0.47	1.02e-20	FCP
S100A2	4.74e-07	0.531033	0.231	0.132	0.0104881	FCP
MDM2	1.02e-08	0.528388	0.364	0.236	0.000224891	FCP
EZR	8.58e-21	0.521892	0.874	0.776	1.9e-16	FCP
VEGFA	6.65e-11	0.519555	0.556	0.421	1.47e-06	FCP
GFPT1	6.21e-11	0.515023	0.552	0.424	1.37e-06	FCP
MKNK2	2.95e-27	0.513364	0.483	0.237	6.52e-23	FCP
SESN2	3.37e-22	0.511694	0.385	0.185	7.44e-18	FCP
SNORC	1.67e-08	0.502462	0.598	0.481	0.000368595	FCP
WARS	1.22e-21	0.50116	0.357	0.164	2.7e-17	FCP
HSPA5	7.51e-19	0.493323	0.962	0.93	1.66e-14	FCP
HACD2	3.52e-14	0.492879	0.315	0.169	7.78e-10	FCP
PPP1R3C	7.15e-08	0.492186	0.469	0.367	0.0015805	FCP
TPM1	1.36e-22	0.471218	0.517	0.285	3e-18	FCP
ACAP2	5.47e-16	0.468097	0.483	0.307	1.21e-11	FCP
ANXA1	5.49e-25	0.463228	0.993	0.976	1.21e-20	FCP
SLPI	1.57e-10	0.45545	0.668	0.512	3.48e-06	FCP
EGR1	2.14e-18	0.446399	0.92	0.799	4.73e-14	FCP
BNIP3	4.15e-15	0.440661	0.745	0.586	9.17e-11	FCP
TNFRSF12A	2.6e-21	0.4362	0.853	0.678	5.74e-17	FCP
SEL1L	2.7e-12	0.434368	0.427	0.277	5.96e-08	FCP
APOD	1.35e-06	0.433441	0.503	0.385	0.02993	FCP
GAS5	6e-14	0.429088	0.738	0.638	1.33e-09	FCP
SLFN5	1.54e-21	0.423712	0.189	0.059	3.41e-17	FCP
ARID5B	8.26e-12	0.4217	0.794	0.665	1.83e-07	FCP
XPOT	1.13e-22	0.420019	0.406	0.194	2.5e-18	FCP
ACTG1	4.45e-23	0.412499	0.976	0.956	9.84e-19	FCP
IGF2	0.000128832	0.411334	0.161	0.095	1	FCP
DKK1	0.00340657	0.407867	0.294	0.239	1	FCP
C6orf48	1.13e-15	0.405216	0.689	0.538	2.5e-11	FCP
CLIP1	2.63e-11	0.40038	0.402	0.26	5.82e-07	FCP
SERPINE1	1.39e-09	0.39911	0.794	0.686	3.08e-05	FCP
CDC42EP3	1.97e-12	0.398939	0.301	0.162	4.36e-08	FCP
CANX	1.36e-17	0.398547	0.885	0.8	3e-13	FCP
RHOA	3.77e-16	0.397741	0.934	0.871	8.34e-12	FCP
PSAT1	2.34e-22	0.393555	0.364	0.162	5.16e-18	FCP
BAG3	1.95e-10	0.392497	0.853	0.781	4.3e-06	FCP
RTN3	9.94e-10	0.386818	0.535	0.42	2.2e-05	FCP
GADD45A	1.16e-05	0.38567	0.545	0.459	0.257254	FCP
GARS	1.28e-12	0.384135	0.678	0.541	2.82e-08	FCP
MIDN	1.14e-11	0.382783	0.49	0.332	2.52e-07	FCP
LRRC2	2.19e-18	0.380161	0.283	0.12	4.84e-14	FCP
SLC7A11	8.27e-22	0.37673	0.231	0.08	1.83e-17	FCP
DNAJB1	3.45e-18	0.374851	0.979	0.97	7.63e-14	FCP
NMB	0.000146949	0.374216	0.189	0.118	1	FCP
ACTB	7.99e-29	0.374071	0.993	0.971	1.77e-24	FCP
PEG10	3.98e-08	0.373077	0.196	0.1	0.000879435	FCP
RND3	2.57e-05	0.368331	0.675	0.602	0.568568	FCP
TIPARP	5.44e-05	0.365247	0.685	0.624	1	FCP
ME1	3.11e-12	0.364495	0.294	0.156	6.87e-08	FCP
LRIF1	1.08e-08	0.362697	0.437	0.302	0.000238422	FCP
EMP1	2.79e-10	0.361852	0.951	0.909	6.18e-06	FCP
MT1H	0.00707442	0.359911	0.234	0.181	1	FCP
JUND	5.57e-11	0.359633	0.552	0.399	1.23e-06	FCP
ZFAS1	9.27e-12	0.356814	0.85	0.772	2.05e-07	FCP
EIF3J	5.22e-09	0.351552	0.633	0.538	0.000115403	FCP
ENO2	0.000235146	0.349546	0.402	0.331	1	FCP
YWHAH	4.12e-06	0.345839	0.35	0.258	0.0910048	FCP
RPS27L	6.5e-07	0.345022	0.766	0.685	0.0143618	FCP
SGMS2	8.51e-09	0.344335	0.437	0.31	0.000188049	FCP
CDKN1C	4.03e-06	0.343465	0.402	0.3	0.0890114	FCP
HSPH1	2.75e-15	0.341912	0.944	0.921	6.08e-11	FCP
RPS19	2.9e-32	0.341704	0.997	0.996	6.41e-28	FCP
FTL	1.25e-14	0.338601	0.993	0.998	2.76e-10	FCP
RPS16	2.21e-33	0.337817	0.997	0.991	4.88e-29	FCP
RPL31	4.6e-31	0.336789	1	0.999	1.02e-26	FCP
CYCS	8.99e-10	0.334501	0.836	0.771	1.99e-05	FCP
FAM180A	8.97e-09	0.333313	0.217	0.114	0.000198322	FCP
IGFBP3	1.49e-07	0.330024	0.115	0.05	0.00328562	FCP
MBD4	3.04e-05	0.329658	0.378	0.298	0.672156	FCP
BACH1	1.42e-06	0.329244	0.413	0.304	0.0313272	FCP
CHCHD7	5.39e-06	0.328006	0.458	0.368	0.119124	FCP
SDC2	2.49e-09	0.327636	0.636	0.517	5.5e-05	FCP
RCAN1	0.0106393	0.326676	0.465	0.422	1	FCP
SLC27A2	1.64e-31	0.324454	0.168	0.037	3.62e-27	FCP
COL11A2	3.2e-08	0.323629	0.514	0.377	0.000707525	FCP
PPP1R15A	6.38e-14	0.322806	0.829	0.691	1.41e-09	FCP
PABPC1	8.16e-23	0.320954	1	0.981	1.8e-18	FCP
TUBB4B	8e-11	0.320534	0.713	0.587	1.77e-06	FCP
CLINT1	9.68e-11	0.32027	0.682	0.554	2.14e-06	FCP
CIRBP	1.22e-09	0.318529	0.713	0.602	2.7e-05	FCP
FOSL1	6.37e-07	0.317069	0.594	0.487	0.0140946	FCP
STK17B	4.6e-07	0.316306	0.22	0.129	0.0101672	FCP
NEU1	1.98e-09	0.315748	0.441	0.294	4.38e-05	FCP
CDKN1A	3.45e-07	0.314671	0.797	0.784	0.00763538	FCP
ATP2B1	1.72e-05	0.313741	0.353	0.261	0.380055	FCP
STK17A	7.32e-08	0.313105	0.451	0.333	0.00161883	FCP
RPL37A	2.27e-22	0.312443	0.997	0.993	5.02e-18	FCP
EIF4A3	4e-09	0.310919	0.811	0.709	8.83e-05	FCP
SPART	1.24e-08	0.310596	0.528	0.408	0.000274522	FCP
CNMD	0.000682236	0.304698	0.643	0.583	1	FCP
PDCD4	1.52e-08	0.303931	0.559	0.44	0.000335465	FCP
SPCS3	4.11e-07	0.303022	0.423	0.315	0.00908594	FCP
RPS27	7.39e-31	0.302954	1	0.999	1.63e-26	FCP
HSPA8	2.74e-13	0.302711	0.99	0.971	6.06e-09	FCP
DARS	1.83e-07	0.302186	0.563	0.459	0.00405198	FCP
MCL1	7.28e-10	0.299876	0.741	0.629	1.61e-05	FCP
FOSB	3.04e-11	0.299206	0.923	0.883	6.72e-07	FCP
ORMDL1	2.98e-06	0.298834	0.371	0.279	0.0659221	FCP
TMSB10	6.21e-09	0.296483	0.85	0.775	0.000137214	FCP
RHEB	2.28e-06	0.295167	0.591	0.499	0.05047	FCP
RPLP1	1.13e-42	0.294846	1	1	2.51e-38	FCP
YWHAG	1.27e-08	0.294588	0.608	0.489	0.000281137	FCP
APLP2	8.32e-11	0.294412	0.629	0.489	1.84e-06	FCP
H1F0	0.0182543	0.294403	0.325	0.291	1	FCP
PREPL	4.34e-10	0.294111	0.357	0.218	9.6e-06	FCP
SLC38A1	4.97e-07	0.293911	0.542	0.436	0.010994	FCP
NDEL1	3.34e-05	0.293501	0.42	0.339	0.738745	FCP
ERRFI1	1.14e-13	0.293141	0.867	0.759	2.51e-09	FCP
MAFF	4.18e-06	0.292631	0.451	0.352	0.0923861	FCP
ARNTL	1.64e-07	0.292303	0.399	0.282	0.00363054	FCP
ACAN	1.5e-05	0.291353	0.822	0.805	0.332356	FCP
DPYSL3	1.66e-05	0.291149	0.458	0.374	0.367089	FCP
SNHG5	8.83e-09	0.29077	0.885	0.837	0.000195181	FCP
HSP90AA1	1.24e-17	0.28906	0.997	0.994	2.75e-13	FCP
RPS13	1.8e-28	0.288832	1	0.997	3.99e-24	FCP
EEF2	3.25e-12	0.288331	0.871	0.805	7.18e-08	FCP
RPL36	5.91e-20	0.287598	0.997	0.98	1.31e-15	FCP
EGLN3	7.22e-07	0.286726	0.486	0.366	0.0159705	FCP
CCPG1	1.62e-09	0.286029	0.266	0.151	3.58e-05	FCP
MYADM	4.36e-07	0.285554	0.685	0.589	0.00964317	FCP
SERTAD1	7.7e-05	0.285442	0.49	0.419	1	FCP
RPL13A	4.34e-29	0.283296	0.997	0.998	9.6e-25	FCP
DDIT3	2.54e-05	0.282892	0.388	0.298	0.561516	FCP
RIMS2	4.05e-34	0.281548	0.115	0.018	8.96e-30	FCP
ZC3H12C	6.48e-16	0.281466	0.157	0.052	1.43e-11	FCP
CPEB4	5.8e-05	0.281226	0.353	0.275	1	FCP
OTUD1	0.00407498	0.281086	0.224	0.17	1	FCP
DNAJC3	6.8e-06	0.279211	0.713	0.643	0.150281	FCP
PNRC1	1.57e-09	0.279143	0.941	0.872	3.47e-05	FCP
VCL	8.91e-05	0.278961	0.374	0.297	1	FCP
C7orf50	1e-07	0.278161	0.196	0.105	0.00221218	FCP
ABL2	1.54e-06	0.277878	0.413	0.296	0.0341102	FCP
CNOT10	2.4e-07	0.27644	0.178	0.093	0.00529896	FCP
ADPRHL1	0.000419631	0.276405	0.514	0.431	1	FCP
EIF2S2	2.19e-09	0.276175	0.832	0.741	4.83e-05	FCP
RPS21	1.2e-12	0.274917	0.955	0.96	2.66e-08	FCP
EIF4EBP1	8.84e-09	0.274147	0.276	0.159	0.000195353	FCP
LRRFIP1	9.29e-06	0.273647	0.664	0.599	0.205431	FCP
GFPT2	9.13e-06	0.273363	0.643	0.567	0.201823	FCP
KLHL21	1.16e-06	0.27323	0.479	0.367	0.0255786	FCP
HSPA1B	3.39e-12	0.272349	0.878	0.804	7.5e-08	FCP
YARS	6.93e-07	0.272299	0.374	0.264	0.0153115	FCP
SNHG6	3.16e-06	0.271734	0.577	0.491	0.0697834	FCP
NDRG1	2.19e-06	0.27165	0.514	0.416	0.0483282	FCP
CTNNA1	1.37e-05	0.271504	0.528	0.451	0.302028	FCP
DDIT4L	0.000123119	0.27144	0.395	0.31	1	FCP
XBP1	1.35e-09	0.271251	0.916	0.849	2.99e-05	FCP
MOK	3.44e-11	0.270983	0.245	0.121	7.61e-07	FCP
CCND2	3.14e-05	0.270544	0.465	0.375	0.694157	FCP
AARS	1.13e-12	0.270145	0.224	0.102	2.49e-08	FCP
SMIM26	8.83e-08	0.26896	0.563	0.447	0.00195148	FCP
EIF1	4.32e-22	0.268218	1	0.998	9.55e-18	FCP
ZNF644	1.95e-05	0.267105	0.388	0.297	0.431995	FCP
ETS2	0.000240708	0.266494	0.462	0.384	1	FCP
ATF6	9.57e-06	0.266095	0.483	0.389	0.211563	FCP
TMEM41B	6.63e-05	0.262029	0.29	0.214	1	FCP
DSP	3.44e-06	0.260976	0.451	0.337	0.0759562	FCP
RPL12	7.57e-16	0.260555	0.99	0.972	1.67e-11	FCP
CP	2.26e-05	0.259549	0.664	0.571	0.499183	FCP
SRPRA	0.000383369	0.25905	0.601	0.564	1	FCP
PHACTR4	3.47e-05	0.258717	0.28	0.196	0.767774	FCP
RPL21	4.72e-28	0.258491	1	0.999	1.04e-23	FCP
UFM1	3.16e-06	0.257307	0.685	0.624	0.069958	FCP
FAM162A	0.00197357	0.256908	0.566	0.506	1	FCP
DDR2	0.000147965	0.25661	0.507	0.432	1	FCP
TNFRSF10B	2.46e-07	0.256176	0.276	0.173	0.00544898	FCP
MXD1	5.21e-05	0.255277	0.598	0.516	1	FCP
SSR3	1.1e-06	0.254707	0.825	0.767	0.0242933	FCP
MBNL2	0.000299043	0.25453	0.444	0.377	1	FCP
RPLP2	2.67e-21	0.253987	1	0.996	5.89e-17	FCP
HSPB1	0.0253773	0.253292	0.888	0.907	1	FCP
P4HA1	0.000910064	0.252907	0.752	0.73	1	FCP
PAPOLA	8.76e-07	0.252878	0.752	0.708	0.01937	FCP
RPL37	1.7e-18	0.252712	0.997	0.991	3.75e-14	FCP
ULBP2	9.79e-05	0.251906	0.28	0.202	1	FCP
AMD1	1.74e-08	0.25137	0.804	0.712	0.000384194	FCP
RPL3	5.2e-20	0.251204	0.993	0.989	1.15e-15	FCP
HSPA1A	1.82e-12	0.251105	0.969	0.942	4.02e-08	FCP
CYSTM1	9.82e-08	0.25107	0.514	0.388	0.00217104	FCP
CLCN3	7.76e-09	0.250753	0.252	0.142	0.000171582	FCP
IGFBP4	3.53e-11	0.250359	0.175	0.075	7.8e-07	FCP
NEDD9	0.00713298	0.250187	0.423	0.38	1	FCP
GCLM	2.69e-06	0.250094	0.311	0.211	0.0595718	FCP
FOS	0	1.86449	0.901	0.519	0	HomC
JUN	0	1.52107	0.945	0.594	0	HomC
ZFP36	0	1.32789	0.688	0.216	0	HomC
RGS16	0	1.28085	0.526	0.236	0	HomC
IER2	0	1.27884	0.722	0.298	0	HomC
ID3	0	1.15059	0.642	0.19	0	HomC
JUNB	0	1.12895	0.813	0.412	0	HomC
ATF3	0	1.10122	0.94	0.66	0	HomC
EGR1	0	1.07807	0.958	0.76	0	HomC
IRF1	0	1.06711	0.485	0.24	0	HomC
GADD45B	0	1.01425	0.963	0.756	0	HomC
CCNL1	0	1.00682	0.893	0.619	0	HomC
DUSP1	0	0.978192	0.593	0.296	0	HomC
HES1	0	0.969015	0.423	0.144	0	HomC
HSPA6	4.15868e-282	0.933465	0.356	0.166	9.19484e-278	HomC
ISG15	2.92316e-92	0.911033	0.128	0.056	6.46311e-88	HomC
ID1	0	0.880013	0.573	0.21	0	HomC
ADM	0	0.820888	0.712	0.407	0	HomC
DEPP1	0	0.799143	0.496	0.232	0	HomC
KLF10	0	0.787935	0.815	0.543	0	HomC
BTG2	0	0.770407	0.795	0.537	0	HomC
FOSB	0	0.764489	0.978	0.859	0	HomC
DNAJB4	0	0.763075	0.806	0.599	0	HomC
NFKBIA	2.55056e-289	0.759051	0.729	0.529	5.6393e-285	HomC
DDIT3	0	0.755649	0.538	0.238	0	HomC
TXNIP	0	0.752019	0.598	0.342	0	HomC
PMAIP1	6.27645e-64	0.749657	0.158	0.087	1.38772e-59	HomC
EGR2	0	0.710546	0.31	0.095	0	HomC
IER5	0	0.700417	0.502	0.186	0	HomC
KLF2	0	0.691299	0.51	0.199	0	HomC
PPP1R15A	0	0.671132	0.846	0.653	0	HomC
ZFAND2A	4.28458e-271	0.67095	0.551	0.35	9.4732e-267	HomC
CLK1	0	0.669145	0.712	0.441	0	HomC
ID2	0	0.667944	0.967	0.84	0	HomC
COL1A1	3.31559e-62	0.666721	0.182	0.107	7.33078e-58	HomC
KLF4	0	0.662607	0.896	0.685	0	HomC
RHOB	0	0.645895	0.698	0.421	0	HomC
RSRC2	0	0.642359	0.76	0.551	0	HomC
RGS2	0	0.638803	0.791	0.566	0	HomC
SLC20A1	0	0.630715	0.624	0.331	0	HomC
SGK1	1.15901e-253	0.615833	0.619	0.443	2.56258e-249	HomC
BRD2	0	0.613513	0.742	0.502	0	HomC
DNAJB1	0	0.613147	0.997	0.963	0	HomC
SERTAD1	0	0.605128	0.651	0.361	0	HomC
RSRP1	0	0.589326	0.598	0.369	0	HomC
HSPH1	0	0.574425	0.959	0.912	0	HomC
RRAD	1.51173e-141	0.564614	0.285	0.153	3.34243e-137	HomC
RASD1	0	0.562332	0.344	0.13	0	HomC
PFKFB3	0	0.550576	0.501	0.25	0	HomC
TNFAIP3	4.20053e-127	0.54466	0.233	0.12	9.28738e-123	HomC
TIPARP	2.53558e-286	0.539252	0.791	0.582	5.60617e-282	HomC
PTGS2	2.88316e-164	0.538534	0.625	0.473	6.37467e-160	HomC
KLF6	7.48996e-208	0.528963	0.668	0.504	1.65603e-203	HomC
TRA2B	1.26414e-274	0.52683	0.628	0.442	2.79501e-270	HomC
NUFIP2	0	0.52116	0.822	0.664	0	HomC
NFKBIZ	2.80345e-96	0.5099	0.571	0.448	6.19844e-92	HomC
COL1A2	7.74991e-24	0.488123	0.461	0.417	1.7135e-19	HomC
NR4A2	7.46672e-170	0.475505	0.655	0.49	1.65089e-165	HomC
POSTN	1.33388e-26	0.473123	0.127	0.084	2.9492e-22	HomC
TRA2A	7.83667e-256	0.472259	0.482	0.281	1.73269e-251	HomC
EIF4A2	0	0.470152	0.954	0.886	0	HomC
HSPA8	0	0.464381	0.99	0.967	0	HomC
HSPA1A	0	0.452793	0.981	0.933	0	HomC
MYLIP	5.79982e-307	0.447912	0.374	0.164	1.28234e-302	HomC
COL3A1	1.3199e-43	0.441584	0.58	0.505	2.91829e-39	HomC
CD83	1.1568e-89	0.441487	0.428	0.314	2.55768e-85	HomC
ZFP36L1	1.76546e-176	0.430385	0.504	0.338	3.90342e-172	HomC
HSPD1	7.44113e-205	0.427216	0.967	0.944	1.64523e-200	HomC
IFRD1	2.08271e-224	0.421246	0.642	0.46	4.60488e-220	HomC
ZFP36L2	5.52058e-236	0.417926	0.473	0.275	1.2206e-231	HomC
DNAJA1	0	0.417453	0.988	0.963	0	HomC
UBC	0	0.412061	0.99	0.963	0	HomC
IL32	3.65371e-68	0.409688	0.132	0.066	8.07836e-64	HomC
MT1E	1.00861e-24	0.40852	0.744	0.719	2.23004e-20	HomC
PPP1R10	6.13182e-161	0.407917	0.477	0.316	1.35575e-156	HomC
ZC3H12A	0	0.406303	0.341	0.142	0	HomC
OSR2	2.2893e-222	0.403889	0.397	0.212	5.06164e-218	HomC
SOCS3	0	0.402959	0.267	0.067	0	HomC
MCL1	3.58432e-230	0.399814	0.75	0.599	7.92494e-226	HomC
NR4A1	0	0.399217	0.3	0.111	0	HomC
HSPA1B	8.67485e-221	0.397829	0.885	0.785	1.91801e-216	HomC
GADD45G	3.48665e-242	0.397792	0.227	0.081	7.70899e-238	HomC
PCF11	1.69915e-134	0.396246	0.537	0.403	3.75681e-130	HomC
CKS2	1.94792e-142	0.395574	0.489	0.335	4.30686e-138	HomC
THBS1	8.64388e-114	0.39274	0.538	0.398	1.91116e-109	HomC
SNAI1	0	0.391937	0.26	0.079	0	HomC
HSPA5	3.64471e-31	0.383897	0.932	0.929	8.05845e-27	HomC
GEM	9.71486e-200	0.380254	0.742	0.579	2.14796e-195	HomC
UBB	1.23251e-151	0.379285	0.848	0.773	2.72508e-147	HomC
ARL4D	2.84288e-196	0.372271	0.384	0.213	6.2856e-192	HomC
ZBTB2	1.85601e-261	0.370253	0.239	0.085	4.10364e-257	HomC
SAT1	8.72384e-105	0.367631	0.897	0.86	1.92884e-100	HomC
CHORDC1	3.33117e-102	0.364993	0.697	0.625	7.36521e-98	HomC
COL12A1	1.85134e-34	0.364108	0.244	0.18	4.09331e-30	HomC
RND3	2.37131e-134	0.361828	0.701	0.577	5.24296e-130	HomC
CSRNP1	5.30348e-234	0.361781	0.394	0.204	1.1726e-229	HomC
ARRDC3	4.2864e-112	0.359648	0.471	0.337	9.47723e-108	HomC
SNHG12	1.40311e-198	0.357178	0.296	0.141	3.10228e-194	HomC
PARD6G-AS1	1.00919e-95	0.350257	0.191	0.098	2.23132e-91	HomC
SERPINH1	2.34584e-107	0.348377	0.466	0.34	5.18666e-103	HomC
SRSF7	6.01799e-112	0.348157	0.864	0.827	1.33058e-107	HomC
SPTY2D1	1.55153e-127	0.341791	0.552	0.406	3.43044e-123	HomC
HSPE1	1.36045e-116	0.339156	0.886	0.835	3.00795e-112	HomC
BAG3	7.32117e-94	0.338782	0.827	0.77	1.61871e-89	HomC
SERPINE1	1.76485e-44	0.337723	0.726	0.677	3.90207e-40	HomC
DDX58	3.69203e-81	0.328604	0.142	0.069	8.16307e-77	HomC
MT1M	0.011375	0.327341	0.309	0.307	1	HomC
DUSP6	6.62509e-114	0.323376	0.338	0.211	1.46481e-109	HomC
IFI6	3.36963e-21	0.318805	0.153	0.112	7.45026e-17	HomC
PDK4	6.18045e-62	0.316137	0.268	0.182	1.3665e-57	HomC
RBBP6	4.29022e-54	0.311927	0.797	0.781	9.48567e-50	HomC
IVNS1ABP	1.15903e-133	0.309503	0.805	0.71	2.56262e-129	HomC
ARL4A	7.78146e-139	0.309051	0.238	0.117	1.72048e-134	HomC
ZFAS1	6.64834e-125	0.308836	0.832	0.757	1.46995e-120	HomC
COL8A1	1.25786e-15	0.307986	0.197	0.161	2.78113e-11	HomC
HSP90AA1	3.70644e-177	0.307401	0.999	0.993	8.19494e-173	HomC
CFAP20	1.78698e-100	0.303902	0.487	0.359	3.95102e-96	HomC
MAFB	1.86918e-111	0.302989	0.284	0.164	4.13275e-107	HomC
CDKN1C	5.71794e-46	0.296319	0.365	0.285	1.26424e-41	HomC
DKK1	1.89383e-13	0.294189	0.27	0.232	4.18726e-09	HomC
TSPYL2	8.53757e-96	0.290317	0.356	0.239	1.88766e-91	HomC
ASPN	0.000577793	0.287995	0.241	0.224	1	HomC
RGS3	4.02412e-54	0.286743	0.407	0.318	8.89734e-50	HomC
HSP90AB1	2.34571e-275	0.284114	1	0.996	5.18636e-271	HomC
CYR61	2.40199e-93	0.283134	0.879	0.791	5.3108e-89	HomC
INTS6	7.53432e-105	0.282222	0.368	0.241	1.66584e-100	HomC
FAM46A	2.33089e-85	0.277661	0.604	0.493	5.1536e-81	HomC
NEU1	1.33609e-82	0.273147	0.384	0.272	2.95409e-78	HomC
GLUL	7.27353e-13	0.269055	0.444	0.42	1.60818e-08	HomC
SNHG1	7.41757e-89	0.268748	0.398	0.284	1.64002e-84	HomC
TNC	3.65372e-27	0.262785	0.251	0.194	8.07838e-23	HomC
EZH2	1.58626e-141	0.262553	0.196	0.086	3.50722e-137	HomC
BCLAF1	1.87826e-84	0.262309	0.634	0.54	4.15284e-80	HomC
SKIL	5.49834e-70	0.262049	0.874	0.844	1.21568e-65	HomC
CFH	2.51563e-20	0.261856	0.351	0.295	5.56205e-16	HomC
SNHG5	5.40404e-96	0.257992	0.882	0.826	1.19483e-91	HomC
MMP2	3.07179e-74	0.257829	0.126	0.059	6.79172e-70	HomC
ALAS1	1.4667e-101	0.255905	0.217	0.116	3.24287e-97	HomC
KPNA2	1.78476e-81	0.253768	0.351	0.24	3.94611e-77	HomC
RBM22	9.04325e-41	0.251441	0.435	0.36	1.99946e-36	HomC
DNAJA4	5.52946e-54	0.25108	0.26	0.181	1.22256e-49	HomC
